# Supplementary material
Source: PubMed Central journal article supplement (PMC8317010)
Supplement: jama-e219899-s001.pdf [file jama-e219899-s001.pdf]

1 **Seven vs. 14 Days Treatment for Male Urinary Tract Infection**

2

3

4

5 A randomized placebo-controlled trial of 7 vs. 14 days of antimicrobial treatment for men with  
6 UTI

7

8 **Sponsor:** VA Merit Review, award #1I01CX000830-01A2

9

10 **Intervention:** 7 days of antimicrobial treatment (ciprofloxacin or  
11 trimethoprim/sulfamethoxazole) followed by 7 days of placebo vs. 14 days of antimicrobial  
12 treatment

13

14 Protocol version: 1.0

15

|    |                                             |      |
|----|---------------------------------------------|------|
| 16 | Table of contents                           | Page |
| 17 | 1. Introduction                             | 3    |
| 18 | a. Background                               | 3    |
| 19 | b. Preliminary studies and current status   | 5    |
| 20 | 2. Research design and methods              | 8    |
| 21 | a. Study type                               | 8    |
| 22 | b. Summary of study description             | 8    |
| 23 | c. Details of specific study areas          | 10   |
| 24 | d. Inclusion and exclusion criteria         | 13   |
| 25 | e. Method of identifying potential subjects | 14   |
| 26 | f. Patient contact and enrollment           | 16   |
| 27 | g. Sampling of the intestinal microbiota    | 16   |
| 28 | h. Subject compensation                     | 17   |
| 29 | i. Potential complications during therapy   | 17   |
| 30 | j. Follow-up and outcome assessment         | 17   |
| 31 | k. Safety and monitoring                    | 18   |
| 32 | l. Definitions for safety and monitoring    | 19   |
| 33 | m. Anticipated adverse events               | 19   |
| 34 | n. Statistical methods                      | 21   |
| 35 | o. Proposed timetable                       | 23   |
| 36 | 3. Summary                                  | 23   |
| 37 | 4. References                               | 24   |
| 38 |                                             |      |

## 39 1. Introduction

### 40 1.a. Background

41 Urinary tract infection occurring in males (hereafter, male UTI) is a common infection  
42 among both hospitalized and ambulatory men. Most patients are treated in the outpatient  
43 setting, with only a minority requiring hospitalization<sup>1,2</sup>. Data from the 2000 National  
44 Ambulatory Medical Care Survey demonstrate that male UTI led to 1.8 million annual office  
45 visits and 420,000 annual Emergency Department visits in the U.S.<sup>1,2</sup>. Within the VA health  
46 care system, over 33,000 non-hospitalized men have at least one UTI episode in a 12-month  
47 period<sup>3</sup>. Treatment is typically with oral antimicrobials, for durations ranging from 3 days to  
48 several weeks.

49 Few data from randomized trials are available to guide treatment duration for male UTI. At  
50 one extreme of the treatment duration spectrum, a Scandinavian study found no significant  
51 difference in clinical cure or recurrence rates among men with febrile UTI randomized to 14  
52 vs. 28 days of ciprofloxacin<sup>4</sup>. At the other end of the spectrum, in a study of UTI treatment  
53 duration among patients with spinal cord injury (85% male), 3 days treatment yielded a  
54 higher rate of symptomatic relapse than did 14 days treatment, in both short and long-term  
55 follow-up<sup>5</sup>. No other randomized clinical trials are available that directly assess the impact of  
56 duration of treatment for male UTI on efficacy; accordingly, the conventional  
57 recommendation to treat for 7-14 days is based largely on expert opinion<sup>6-8</sup>. Currently, 7, 10,  
58 and 14-day antimicrobial courses are commonly used to treat UTI in male veterans UTI<sup>3</sup>.

59 In addition to the lack of evidence regarding optimal treatment duration, two well-  
60 documented trends are making management of male UTI progressively more challenging.  
61 First, Gram-negative bacilli, the causative microorganisms for most UTIs, are becoming  
62 increasingly resistant to most relevant antimicrobials; consequently, few reliably active oral  
63 agents are available for UTI therapy, which is often initiated empirically, before culture  
64 results are known. Second, *Clostridium difficile* infection, which is almost invariably  
65 precipitated by antimicrobial use, is increasingly frequent and severe<sup>9,10</sup>.

66 Increasing antimicrobial resistance among Gram-negative bacilli. Antimicrobial resistance  
67 among Gram-negative bacilli, a major public health threat, has attracted considerable  
68 attention from governmental organizations, professional societies, and leaders in the field of  
69 infectious diseases<sup>11</sup>. Perversely, as resistance among Gram-negative bacilli has increased,  
70 the development of new antimicrobials that target these organisms has decreased<sup>11</sup>.

71 The problem of Gram-negative resistance is particularly relevant for treating UTI, because  
72 the vast majority of UTIs are caused by enteric Gram-negative bacilli, in particular  
73 *Escherichia coli*, but also *Klebsiella* species, *Enterobacter* species, and others<sup>8,12</sup>. Guidelines  
74 recommend that when the local prevalence of susceptibility to a particular drug among  
75 uropathogens falls below 80%, that drug should no longer be used as empiric therapy for  
76 UTI<sup>13,14</sup>. Currently, many locations, including the MVAMC, have *E. coli* susceptibility rates  
77 of only 65-70% for both ciprofloxacin and trimethoprim-sulfamethoxazole (TMP-SMZ)  
78 (MVAMC antibiogram, January 2012 through June 2012). These drugs are traditional  
79 cornerstones of UTI treatment in the ambulatory setting because of their excellent oral

80 bioavailability and their track record of tolerability and effectiveness across most types of  
 81 UTI, including febrile UTI and pyelonephritis<sup>15, 16</sup>. In contrast, alternative oral agents,  
 82 including  $\beta$ -lactams, nitrofurantoin, and fosfomycin, have inferior efficacy ( $\beta$ -lactams,  
 83 fosfomycin)<sup>17, 18</sup> and/or achieve low tissue drug levels (nitrofurantoin, fosfomycin)<sup>13, 18</sup>,  
 84 limiting their appeal for UTI therapy, especially for patients with fever or clinical  
 85 manifestations suggesting pyelonephritis<sup>13, 18</sup>.

86 The rising prevalence of resistance to ciprofloxacin and TMP-SMZ has led providers to use  
 87 broader-spectrum empirical therapy, such as a parenteral dose of a more predictably active  
 88 agent combined with empiric oral ciprofloxacin or TMP-SMZ. This practice adds to the  
 89 selective pressure for the development of antimicrobial resistance, thereby causing future  
 90 infections to be even more difficult to treat.

91 Increased incidence and severity of *Clostridium difficile* infection. Beginning in the early  
 92 2000's, an increasing incidence and severity of *C. difficile* infection was observed, first in  
 93 Canada and subsequently worldwide<sup>9, 10, 19, 20</sup>. Multiple factors have been proposed to explain  
 94 these increases, including increased antimicrobial use, emergence of a new fluoroquinolone-  
 95 resistant strain of *C. difficile* during a time of increased fluoroquinolone use, increased  
 96 sporulation and toxin production by this epidemic strain, and better recognition and diagnosis  
 97 of *C. difficile* infection on the part of clinicians<sup>9, 10</sup>. Whatever the explanation, *C. difficile*  
 98 now rivals methicillin-resistant *Staphylococcus aureus* as the leading cause of nosocomial  
 99 infections<sup>21</sup>, and is also increasingly prevalent in the community<sup>22</sup>. Thus, efforts to decrease  
 100 its incidence, including through reduced antimicrobial use, are urgently needed.

101 Relationship between antimicrobial use, antimicrobial resistance, and *C. difficile* infection.  
 102 The relationship between antimicrobial use and subsequent antimicrobial resistance is  
 103 complicated. First, although some patient-level studies have demonstrated the development  
 104 of resistance during or after receipt of antimicrobial therapy<sup>23-25</sup>, in clinical practice the link  
 105 between past antimicrobial use and subsequent infection with a drug-resistant organism is  
 106 difficult to prove. Additionally, most patients in whom a resistant organism emerges do not  
 107 develop a subsequent drug-resistant infection, but rather become carriers of resistant  
 108 organisms as part of their normal bacterial microbiota. Because carriage of resistant  
 109 microorganisms is a clinically silent phenomenon, this is an under-recognized harm of  
 110 antimicrobial use. However, the fecal microbiota serves as the source of many infections,  
 111 including UTIs. In addition, microorganisms can spread easily among household contacts,  
 112 thus increasing the population at risk for infection with a resistant organism<sup>26, 27</sup>. Countries  
 113 with high levels of antimicrobial use typically have correspondingly high rates of  
 114 antimicrobial resistance among clinical isolates, as compared with countries with lower  
 115 levels of use<sup>28, 29</sup>. Similarly, individual centers have documented a temporal relationship  
 116 between antimicrobial use and antimicrobial resistance, with increased use being followed  
 117 shortly thereafter by a corresponding increase in resistance<sup>30</sup>.

118 Antimicrobial use is also closely linked to *C. difficile* infection, almost all cases of which are  
 119 preceded by antimicrobial therapy. Increased antimicrobial use is associated with increased  
 120 *C. difficile* infection<sup>31, 32</sup>, and reduced antimicrobial use has been used successfully to combat  
 121 outbreaks of *C. difficile* infection<sup>33-35</sup>. Accordingly, a joint Clinical Practice Guideline for *C.*  
 122 *difficile* infection from the Society for Healthcare Epidemiology of America and the

123 Infectious Disease Society of America recommends limiting the duration of antimicrobial  
124 therapy a way to decrease the incidence of *C. difficile* infection<sup>36</sup>.

125 In summary, antimicrobial use is associated with increases in antimicrobial resistance and *C.*  
126 *difficile* infection; therefore, effective strategies to minimize unnecessary antimicrobial use  
127 are urgently needed. One potential method to decrease unnecessary antimicrobial use is to  
128 define the minimal effective treatment duration for various diseases, and to use this minimal  
129 duration routinely. This approach has been successfully applied to other infectious diseases,  
130 including ventilator-associated tracheitis<sup>23</sup>, ventilator-associated pneumonia<sup>24</sup>, and  
131 cellulitis<sup>37</sup>. For these disorders, shorter-duration treatment performed as well as longer-  
132 duration treatment, and in the respiratory infections was associated with less colonization and  
133 infection with drug-resistant microorganisms, with or without a trend toward lower mortality-  
134 -without any reduction in efficacy. For male UTI, if 14 days of therapy yields no clinically  
135 relevant benefit to that observed with 7 days of therapy, but induces greater resistance in a  
136 similar manner as seen in the studies of ventilator-associated pneumonia and tracheitis, then  
137 patients treated longer are exposed to potential harms without any benefit. Alternatively, if  
138 longer-duration treatment does provide benefits, then a substantial proportion of men with a  
139 UTI are being treated for an inappropriately short duration, and may be experiencing worse  
140 symptom control and increased rates of recurrence. Accordingly, we propose to conduct a  
141 randomized clinical trial to investigate whether 7 days of antimicrobial treatment is non-  
142 inferior to 14 days of antimicrobial treatment for men with a UTI.

143

#### 144 **1.b. Preliminary studies and current status**

145 Historically, UTIs in both males and females were treated with longer courses of  
146 antimicrobials than are commonly used today, ranging from 7 days for simple cystitis (i.e.,  
147 bladder infection or lower-tract disease), to up to 6 weeks for pyelonephritis (i.e., kidney  
148 infection or upper-tract disease), which is more serious but also comparatively uncommon<sup>38</sup>.  
149 UTI treatment has been studied much more extensively in women than in men; consequently,  
150 optimal treatment durations are more clearly defined for women than for men<sup>13</sup>. In women,  
151 cystitis can be treated effectively with 3 days of a fluoroquinolone or TMP-SMZ, 5 days of  
152 nitrofurantoin, or a single dose of fosfomycin tromethamine; likewise, pyelonephritis can be  
153 treated effectively with 5 days of high-dose levofloxacin, 7 days of standard-dose  
154 ciprofloxacin, or 14 days of TMP-SMZ<sup>13, 39</sup>.

155 In contrast, little is known regarding the optimal treatment duration for male UTI. This is due  
156 in part to the paucity of randomized trials, as compared to UTI in women. It also relates to  
157 the additional structures present in the male genitourinary tract, including the prostate gland,  
158 epididymis, and seminal vesicles, involvement of which is hypothesized to necessitate  
159 longer-duration therapy, since they may serve as sanctuaries or reservoirs from which  
160 residual bacteria can emerge and cause a recurrent infection<sup>6</sup>. Also complicating efforts to  
161 identify the optimal treatment duration in men is the broader range of entities that constitute  
162 the full spectrum of male UTI. Such syndromes range from simple cystitis (manifested as  
163 voiding symptoms in the absence of constitutional manifestations, including fever), to febrile  
164 UTI (voiding symptoms with documented fever), to pyelonephritis (fever with flank pain,

165 with or without voiding symptoms). Finally, UTIs can be categorized as complicated vs.  
166 uncomplicated. Although consensus is lacking as to which specific conditions define a UTI  
167 as being “complicated,” the accepted underlying principle is that these are factors that, when  
168 present, make UTI more likely to occur, more difficult to treat successfully, and less  
169 predictable as to microbiological etiology<sup>7, 8, 40</sup>. Published reviews have recommended  
170 longer-duration treatment for complicated male UTI, but because these recommendations are  
171 based largely on expert opinion, and because of disagreement as to what constitutes a  
172 complicated UTI, they confuse more than clarify the issue of optimal treatment duration.

173 Previous clinical trials. The most robust evidence for treatment duration in the field of male  
174 UTI comes from a non-blinded Scandinavian trial of 114 men with febrile UTI who were  
175 randomized to receive 14 vs. 28 days of ciprofloxacin<sup>4</sup>. All patients experienced resolution of  
176 signs and symptoms of infection during therapy, and cure rates (defined as remaining  
177 symptom-free for two weeks after treatment cessation) were not significantly different  
178 between groups (92% vs. 97%, respectively)<sup>4</sup>. Notably, however, treatment durations less  
179 than 14 days were not investigated, and this trial included only men with febrile UTI, a  
180 syndrome that although clinically important is relatively uncommon.

181 Most men diagnosed with UTI are afebrile, but instead experience new onset of dysuria,  
182 frequency, and/or supra-pubic tenderness<sup>41</sup>. The presence of fever is thought to represent  
183 some component of invasive disease, which presumably can be localized within the prostate,  
184 kidney, or other tissues, although in practice the actual primary focus is rarely sought or  
185 defined, since such knowledge confers no known clinical benefit. Thus, the finding that 14  
186 days of therapy for febrile male UTI performed as well as did 28 days suggests that for men  
187 with the less severe UTI syndrome of cystitis extending the duration of treatment beyond 14  
188 days is unlikely to be beneficial.

189 At the other end of the treatment duration spectrum, in a trial of UTI treatment among spinal  
190 cord injury patients, the 60 subjects (85% male, all without fever) were randomized to  
191 receive 3 vs. 14 days of ciprofloxacin<sup>5</sup>. Although clinical cure (defined as resolution of  
192 symptoms by 19-23 days after treatment initiation) was not significantly different between  
193 the 3 and 14-day treatment groups (63% vs. 53%, respectively), relapse was significantly  
194 more common in the 3-day group (33% vs. 0%;  $P = .001$ )<sup>5</sup>. This suggests that 3 days of  
195 treatment may be insufficient for UTI in men with spinal cord injuries, and perhaps also--  
196 although this has not been specifically studied-- in other men.

197 Previous observational studies. Observational data indicate that in practice the treatment  
198 duration used for male UTI varies significantly, and may influence the likelihood of both  
199 recurrence and adverse events. At our institution (MVAMC), we retrospectively examined  
200 the records of 225 patients (90% male) diagnosed with UTI in 2007-8 for (i) appropriateness  
201 of the diagnosis and the associated treatment duration and (ii) clinical outcome<sup>42</sup>. Treatment  
202 durations ranged from 3 to 14 days among men and women alike. Notably, among the 152  
203 men with complicated UTI, recurrence was significantly more common among those treated  
204 for only 3-7 days, compared with 10-14 days (35% vs. 17%;  $P = .02$ )<sup>42</sup>. This indicates that  
205 for men with complicated UTI (75% of the study population), shorter-duration therapy may  
206 predispose to recurrent infection.

207 In a separate study using VA administrative data for FY2009, we identified 33,336 unique  
208 male veterans treated for UTI, defined as having a diagnostic code for UTI combined with a  
209 prescription for an antimicrobial typically used for UTI<sup>3</sup>. Of these men, 35% received 7 or  
210 fewer days of treatment, whereas the remaining 65% received more than 7 days of treatment.  
211 Recurrence rates were not appreciably different between patients receiving shorter- vs.  
212 longer-duration treatment (3.9% vs. 4.2%, respectively,  $P = .16$ ). However, subsequent *C.*  
213 *difficile* infection was significantly more common among patients receiving longer-duration  
214 treatment. That is, whereas in the total population *C. difficile* infection occurred in 144  
215 (0.4%) of the 33,336 UTI patients, it occurred in only 0.3% of patients receiving shorter-  
216 duration ( $\leq 7$ d) treatment, compared to 0.5% of those receiving longer-duration ( $> 7$ d)  
217 treatment ( $P = .02$ ). With multivariable adjustment for age, Charlson comorbidity score, and  
218 UTI-specific comorbidities (prostatic hypertrophy, urinary calculi, etc), a borderline  
219 significant trend persisted toward increased *C. difficile* infection with treatment durations  
220 greater than 7 days (odds ratio 1.42, 95% confidence interval 0.97 to 2.07). Thus, longer-  
221 duration therapy was not associated with a reduction in recurrence, but may be associated  
222 with increased *C. difficile* infection.

223 Adverse drug events. Adverse drug events are an increasingly recognized consequence of  
224 antimicrobial use. Using active surveillance, the percentage of antimicrobial-treated subjects  
225 who report adverse events has been as high as 30%<sup>15-17</sup>. Commonly reported adverse events  
226 are generally mild, and include nausea, diarrhea, headache, and dizziness. However, more  
227 serious adverse drug events, including allergy, *C. difficile* infection, and interactions with  
228 other medications also occur with antimicrobial use, and are frequent enough such that  
229 antimicrobials are the cause of up to 20% of adverse drug events diagnosed in emergency  
230 departments<sup>43</sup>. Although some adverse drug events, such as anaphylaxis, are unlikely to be  
231 affected by treatment duration, many others, including nausea, diarrhea, *C. difficile* infection,  
232 headache, and dizziness, conceivably could be reduced or avoided by use of shorter-duration  
233 therapy.

234 In summary, the available observational and clinical trial evidence indicates that for male  
235 UTI 28 days therapy offers no demonstrable clinical benefit over 14 days, even within the  
236 febrile UTI subset, whereas a much shorter treatment duration, e.g., 3 days, may increase the  
237 risk of recurrent UTI, even among men with less severe UTI syndromes. This suggests that  
238 the optimal treatment duration should be longer than 3 days, but not longer than 14 days,  
239 which comports with current recommendations for 7-14 days of treatment. However, *C.*  
240 *difficile* infection may be more frequent among patients treated for more than 7 days,  
241 compared to 7 days or fewer. Minor adverse drug events are common with UTI treatment,  
242 but whether their frequency is influenced by treatment duration is unknown. Additionally,  
243 although the effect of treatment duration on intestinal carriage of antimicrobial-resistant  
244 organisms is unknown for UTI, in other infectious diseases longer treatment durations have  
245 been associated with increased colonization and infection with drug-resistant organisms,  
246 compared with shorter treatment durations. Thus, since longer treatment may have  
247 demonstrable harms, apart from the obvious cost and convenience issues, for longer-duration  
248 treatment to be justified it should confer demonstrable clinical benefit. Accordingly, a  
249 randomized trial of shorter vs. longer-duration treatment for male UTI is needed, to  
250 determine whether 7 days of treatment is non-inferior to 14 days of treatment.

## 251 2. Research design and methods

252

### 253 2.a. Study type

254 We propose to conduct a randomized, double-blind, placebo-controlled trial to determine  
255 whether, among men with UTI, 7 days of antimicrobial treatment is non-inferior to 14 days  
256 of treatment for resolution of UTI symptoms. The proposed trial will randomize 319 men  
257 with UTI to 7 vs. 14 days of treatment. Antimicrobial selection will be at the discretion of the  
258 treating clinician. The primary endpoint will be resolution of pre-therapy UTI symptoms, as  
259 assessed 14 days after the last dose of active antimicrobial. Secondary outcomes will include  
260 intestinal carriage of antimicrobial-resistant Gram-negative bacilli, recurrence of  
261 symptomatic UTI, and adverse drug events.

262

### 263 2.b. Summary of study description

264 We propose to conduct this study at a single site, the Minneapolis VA Medical Center  
265 (MVAMC). Potential subjects will be enrolled from the Primary Care Center and the  
266 Emergency Department/Urgent Care. To minimize the possibility that the decision to  
267 participate is influenced by the initial duration of therapy prescribed, every effort will be  
268 made to enroll patients prior to their being prescribed antimicrobial treatment. This will be  
269 done by close collaboration with nurse-managers in the 4 clinical areas from which we plan  
270 to enroll (3 primary care clinics and the urgent care), and by having the study coordinator  
271 paged when men with UTI symptoms are seen by the intake nurses. Additionally, because we  
272 are intervening only on treatment duration, and all enrolled patients will receive at least 7  
273 days of antimicrobial treatment, we will be able to identify and enroll patients seen during  
274 off-hours, or those who were missed during regular hours, several days after their initial  
275 clinical presentation, but before they have completed 7 days of treatment. Thus, although we  
276 plan to enroll the majority of patients at the time of initiating therapy, we will be able to  
277 recruit sufficient numbers of subjects without needing to maintain the multiple shifts of study  
278 personnel typically needed to enroll patients presenting during evening, night, or weekend  
279 tours.

280 Potential subjects will be identified by the chief complaint elicited by the intake nurses in the  
281 outpatient clinics and urgent care, and by notifications from clinic pharmacists regarding new  
282 UTI prescriptions. Patients with symptoms of dysuria, urinary frequency, urgency,  
283 hematuria, perineal pain, supra-pubic pain, costovertebral angle tenderness, or flank pain will  
284 trigger a page to the study coordinator, who will come to the clinic area to assess the patient  
285 for study inclusion. The nurse managers of the involved clinics have indicated that this would  
286 not overly burden their staff or resources. Patients presenting with UTI during evening, night,  
287 weekends, or holidays will be identified by searching recent outpatient clinic encounters for  
288 the specific International Classification of Diseases, 9<sup>th</sup> revision (ICD-9) codes that in our  
289 preliminary studies effectively identified clinical encounters with a new UTI diagnosis. Each  
290 day, study staff will review the list of patients newly assigned any of these codes, i.e., the



291 potential subjects, and their medical records to determine (i) the validity of the UTI diagnosis  
292 and (ii) whether the patient meets eligibility criteria, as detailed below.

293 Patients who pass this screen will be contacted, will receive a brief study description, and  
294 will be invited to a study visit at which study participation will be further discussed. The visit  
295 must occur before the patient completes 7 days of treatment. Patients will be asked to bring  
296 their current antimicrobial with them. At the visit, inclusion/exclusion criteria will be  
297 verified, any questions will be answered, and written informed consent will be obtained.  
298 Patients will also be invited to participate in a sub-study that investigates the effect of  
299 treatment duration on the intestinal carriage of antimicrobial-resistant Gram-negative bacilli  
300 (hereafter, resistance sub-study). After providing consent, subjects will be randomized to 7  
301 vs. 14 days of antimicrobial treatment (of the same agent their provider prescribed for them),  
302 and will exchange their current medication for a special medication supply provided by the  
303 study. All medications provided by the patients will be collected and returned to the  
304 MVAMC research pharmacy for disposal. Subjects will be provided with a calendar to use as  
305 a symptom diary and will be instructed to record in it their UTI symptoms and any potential  
306 adverse drug events, to facilitate accurate recall during follow-up.

307 The special medication supply to be given to the subjects will be a 14-day pill container  
308 loaded with a sufficient supply of medication to complete a 14-day course of treatment  
309 (which, for patients randomized to 7-day therapy, will include 7 days of placebo). For  
310 example, a patient enrolled prior to initiating therapy will be dispensed a full 14-day course  
311 of study medication. Similarly, a patient with a study visit that falls on day 4 of treatment  
312 will have the first 4 days of the pill container emptied, and will complete treatment using the  
313 remaining 10-day supply of medication. We will enroll only patients treated initially with  
314 ciprofloxacin and TMP-SMZ, which are used to treat over 90% of male VA patients with  
315 UTI<sup>3</sup>. In addition to being the most frequently used medications for male UTI, both agents  
316 are highly bioavailable with oral administration, and achieve excellent penetration into the  
317 male genitourinary tract (6, 8). Study medications will be provided as identical-appearing  
318 powder within opaque gelatin capsules (#000), as were previously used to blind a trial  
319 comparing ciprofloxacin and TMP-SMZ<sup>15</sup>. Each pill container will have active antimicrobial  
320 for days 1-7, followed by either active antimicrobial or placebo for days 8-14. Both subjects  
321 and investigators will be blinded to duration of active antimicrobial therapy.

322 After enrollment, subjects will be contacted by telephone on or about the scheduled day of  
323 medication completion, and again at days 7, 14, and 28 ( $\pm 2$ ) after medication completion.  
324 On the day of medication cessation, study staff will verify medication adherence (by patient  
325 report) and will inquire regarding the presence of (i) UTI symptoms, (ii) signs or symptoms  
326 of *C. difficile* infection, (iii) other adverse drug events, and (iv) possible infectious  
327 complications (retreatment, receipt of care outside the VA system, etc.). Adverse drug events  
328 will be elicited first via an open-ended question, then by inquiring specifically regarding a  
329 list of typical antimicrobial-related adverse drug events symptoms such as nausea, vomiting,  
330 diarrhea, dizziness, rash, thrush, and headache. Similar assessments (excluding medication  
331 adherence) will be performed at 7, 14, and 28 days after stopping study medication.

332 Resolution of UTI symptoms, the primary outcome, will be assessed 7 and 14 ( $\pm 2$ ) days after  
333 completing medication. However, after study completion and unblinding of treatment  
334 allocation, the outcome assessment corresponding to 14 days after last receipt of active

335 antimicrobial will be used for analysis. That is, for subjects in the shorter-duration group, the  
 336 7 day assessment will be used, whereas for subjects in the longer-duration group, the 14 day  
 337 assessment will be used, such that all subjects are assessed 14 days after their last dose of  
 338 active antimicrobial. Additionally, with the 7 days post-treatment call, subjects in the  
 339 resistance sub-study will be reminded to obtain a stool swab and to return it using the  
 340 provided mailer. After the final (28d) follow-up call, subjects will have completed their  
 341 participation in this study. If at any time subjects report new or unresolved UTI symptoms, or  
 342 symptoms consistent with *C. difficile* infection or other adverse drug events, they will be  
 343 directed to seek medical care from their primary care provider or the MVAMC Emergency  
 344 Department.

345 A 3-member data safety monitoring board (DSMB) will be formed to oversee the safety of  
 346 this trial, assisted by a biostatistician with experience in clinical trials. Under the direction of  
 347 the DSMB, the biostatistician will conduct 2 interim analyses, when approximately 33% and  
 348 66% of the planned 319 subjects have been evaluated for the primary endpoint. An alpha-  
 349 spending function approach as described by Lan & DeMets is proposed<sup>44</sup>, testing for both  
 350 non-inferiority and futility. Additionally, rates of adverse events in the treatment groups will  
 351 be monitored by the DSMB, and reported to the MVAMC institutional review board.

352 After enrollment and follow-up are concluded, and laboratory testing complete, results will  
 353 be analyzed using a per-protocol analysis, with subjects analyzed according to which  
 354 treatment they received. An intention-to-treat analysis will be performed as a secondary  
 355 analysis. We will test our primary hypothesis that 7 days of antimicrobial treatment is non-  
 356 inferior to 14 days of treatment for the resolution of UTI symptoms by comparing the  
 357 proportion of subjects in each group reporting resolution of pre-therapy UTI symptoms at 14  
 358 days after completing active antimicrobial therapy. For the purposes of statistical power  
 359 calculation, treatment inferiority is defined as >10% efficacy between treatment groups. A  
 360 sample size of 290 subjects (145/group) was calculated, using a one-sided alpha level of  
 361 0.025 and power of 85%, to allow detection of a minimum clinically significant absolute  
 362 difference of 10% (e.g., 90% for 14-day treatment, vs. 80% for 7-day treatment). To adjust  
 363 for potential loss of subjects to follow-up, we increased our enrollment goal by 10% (20  
 364 subjects), for a total sample size of 319.

365 Both treatment groups will be assumed to be superior to no treatment, based on prior studies  
 366 of UTI demonstrating that spontaneous cure occurs in a minority (7-28%) of subjects<sup>45, 46</sup>.  
 367 Accordingly, it would be unethical to include a placebo-only treatment group.

368

### 369 **2.c. Details of specific study areas**

370 Selection of treatment duration. Our decision to compare 7 vs. 14 days treatment duration  
 371 was based on prior studies<sup>4, 5, 15</sup>, the range of current expert recommendations<sup>7, 8, 47</sup>, and  
 372 current practice within the VA system (unpublished data)<sup>4</sup>. The choice of 14 days for the  
 373 longer-duration treatment arm was relatively straightforward. As outlined in the “prior  
 374 clinical trials” section above, 14 days was the shorter duration arm in the Swedish study that  
 375 found no significant efficacy difference between 14 vs. 28 days of treatment<sup>4</sup>. Also, 14 days  
 376 frequently appears in reviews as the upper-limit of recommended treatment duration for male

377 UTI<sup>7, 8, 40, 47</sup>. Finally, among 33,000 male UTI episodes treated in the VA system in fiscal  
378 year 2009, only a small minority (8%) received more than 14 days of therapy<sup>3</sup>.

379 In contrast, the choice of 7 days for the shorter-duration treatment arm was more difficult,  
380 since no prior clinical trial of male UTI has used this duration. However, since the 3 vs. 14-  
381 day study by Dow et al. among spinal cord injury patients showed a statistically significant  
382 increased risk of symptomatic recurrence among subjects receiving 3 days of treatment, we  
383 believe that there is not clinical equipoise between 3 and 14 days treatment duration. This  
384 belief is reinforced by our own observational data from the MVAMC showing an increase in  
385 recurrence among subjects receiving shorter-duration treatment (as discussed above), and the  
386 fact that experts typically offer only guarded endorsement for the possibility of using 3-day  
387 therapy (which is widely accepted as appropriate for women with uncomplicated cystitis) for  
388 treating male UTI, and even then only in young, otherwise healthy men with no complicating  
389 conditions<sup>40</sup>.

390 Although 7 days is a widely recommended lower-limit of treatment duration for male UTI<sup>7, 8,</sup>  
391 <sup>40</sup>, in our VA administrative data of male UTI treatment, we observed that 10 days of  
392 treatment was actually more common than 7 days, which might suggest that a 10-day  
393 duration should be studied. However, if we were to compare 10 vs. 14-day therapy, a  
394 between-arm treatment duration difference of only 4 days would make our groups prone to  
395 crossover contamination, with those allocated to 14 days of treatment needing to miss only a  
396 few doses of antimicrobials to merge with the 10-day group. Additionally, the favorable  
397 impact on resistance selection, *C. difficile* infection, and other adverse drug events of a 4-day  
398 (29%) reduction in treatment duration is likely to be less than with a 7-day (50%) reduction.  
399 Therefore, we selected 7 days for the shorter-duration treatment arm.

400 Blinding. Because our primary outcome is subjective (i.e., patient symptom reports), we are  
401 planning to blind participants, investigators, and clinicians to the duration of active treatment,  
402 to minimize potential bias that could be introduced if patients knew that they were receiving  
403 shorter-duration treatment. There are difficulties inherent to this approach. First, since we are  
404 proposing to randomize subjects only to different treatment durations (not to different  
405 antimicrobials), we are not in control over which antimicrobials will be prescribed.  
406 Fortunately, 90% of diagnosed outpatient male UTIs in the VA system, both nationally and at  
407 the MVAMC, are treated with ciprofloxacin (65%) or TMP-SMZ (25%)<sup>3</sup>. The remaining  
408 10% are treated with a wide variety of agents, including nitrofurantoin, cephalexin,  
409 amoxicillin, amoxicillin/clavulanate, etc. We opted to include only patients receiving  
410 ciprofloxacin and TMP-SMZ, since the other antimicrobials are used so infrequently that no  
411 valid outcome comparisons could be made, and some are dosed more than the twice-daily  
412 ciprofloxacin and TMP-SMZ, increasing the burden on our research pharmacy.

413 To achieve double-blinding, our research pharmacy will prepare 14-day pill containers  
414 specifically for this study. This will be done by using identical encapsulated antimicrobials  
415 and placebos, a method that was used successfully in a previous UTI treatment trial that  
416 compared ciprofloxacin and TMP-SMZ<sup>15</sup>. Specifically, a local compounding pharmacy  
417 (Weber and Judd Co., Inc., Rochester, MN) can provide powdered ciprofloxacin, TMP-SMZ,  
418 and an identical-appearing placebo in identical-appearing capsules. Research pharmacy staff  
419 will prepare 4 different types of containers with these capsules. The containers for the longer-  
420 duration subjects will contain 14 days of ciprofloxacin or TMP-SMZ. Those for the shorter-

421 duration subjects will contain 7 days of ciprofloxacin or TMP-SMZ, followed by 7 days of  
422 identical-appearing placebo. After randomization, research pharmacy staff will provide  
423 subjects with the appropriately-prepared container. For those subjects who were initially seen  
424 during off-tour hours and enrolled after starting treatment, this will include removing the  
425 drug supply for the days in which subjects were treated before enrollment.

426 The logistics of blinding are as follows: at enrollment, the study coordinator will notify the  
427 pharmacy that a patient has been enrolled, and whether ciprofloxacin or TMP-SMZ is being  
428 used. Since we are stratifying based on catheter use (see below), the coordinator will inform  
429 the pharmacy to use the randomization schedule appropriate to the patient's catheter status  
430 and antimicrobial received. Working from this randomization schedule, the pharmacy will  
431 send a 14-day supply of medication to the appropriate clinic, with neither the study  
432 coordinator nor the patient knowing whether days 8-14 are active antimicrobial or placebo.  
433 The research pharmacy at the MVAMC will be charged with tracking and dispensing study  
434 medications, a function that they routinely provide for other double-blinded studies. The  
435 research pharmacy staff can also unblind the patient in the event of a clinical emergency for  
436 which unblinding is deemed necessary. Criteria for unblinding will be admission to the  
437 hospital for suspected urosepsis or severe drug reaction, or any other scenario as directed by  
438 the local institutional review board, which reviews all study-related serious adverse events.  
439 The effectiveness of blinding will be assessed by asking patients which treatment they think  
440 they received 7 days after completing the study medication.

441 Randomization. Randomization will be used to ensure that baseline characteristics, including  
442 any potential confounders, are equally distributed between the 2 treatment groups. To ensure  
443 relatively equal sample size between the shorter and longer therapy duration groups, block  
444 randomization will be used. However, since the proposed sample size is 319 subjects, it is  
445 possible that uncommon factors may be unevenly distributed with a simple 1:1  
446 randomization plan. Accordingly, we plan to stratify our randomization by presence of  
447 urinary catheter use, a potential confounder that occurs in approximately 10% of male UTI  
448 patients at the MVAMC (unpublished data). This will create 2 strata, each of which will have  
449 its own randomization schedule, using permuted blocks of 4.

450 Urinary catheter use is relatively uncommon, but is hypothesized by some authorities to  
451 require longer-duration therapy<sup>40, 48</sup>. Thus, by allocating this factor in a relatively equal  
452 distribution we will ensure that outcomes are not affected by an imbalance in this potentially  
453 more difficult-to-treat form of male UTI. Although we initially planned to enroll patients  
454 with febrile UTI, because of reviewer concerns, and an ongoing Dutch study specifically  
455 addressing treatment duration in men with febrile UTI<sup>49</sup>, we have opted to forego including  
456 patients with febrile UTI. Since less than 2% of subjects treated in the outpatient setting for  
457 male UTI are febrile (unpublished data), this should not significantly affect our enrolment.

458 Sample size calculations. To determine an appropriate sample size, we first established the  
459 minimum significant difference in the primary outcome (resolution of UTI symptoms) that  
460 would be clinically relevant. Literature review identified UTI studies that used absolute  
461 differences of 10% to 20% for the minimum significant difference<sup>4, 15, 49</sup>. Separately, we  
462 queried four international UTI experts as to what difference in treatment success they would  
463 view as clinically significant. The range of their responses was also 10-20%, with a mean of  
464 12.5%. Using the conservative lower-limit (10%) as the minimum significant difference the

465 proposed study should be able to detect, and a percentage of subjects experiencing resolution  
 466 of symptoms with 14 days therapy of 90%<sup>4</sup>, we then calculated a total sample size of 290  
 467 subjects needed to detect such a difference with 85% power, using a one-sided alpha of  
 468 0.025. Accordingly, a group size of 145 subjects (290 total) would provide 85% power to  
 469 detect a 10% absolute between-group difference in the primary outcome (i.e., 90% vs. 80%).  
 470 After adjusting to account for up to a 10% (29 subjects) loss to follow-up, the final  
 471 enrollment goal was set at 319 subjects.

472 The above calculation assumes a conservative 90% for the outcome of resolution of UTI  
 473 symptoms. However, in the trial of men with febrile UTI, resolution occurred in 92% (14d)  
 474 and 97% (28d) of subjects. If we were to assume that 95% of subjects will have resolution of  
 475 symptoms, instead of the more conservative 90%, then the total number of subjects needed to  
 476 achieve 85% power to detect a 10% absolute between-group difference in the primary  
 477 outcome would decrease. However, this may be an overly optimistic projection. Accordingly,  
 478 we have planned our study using the more conservative assumption of a 90% symptom  
 479 resolution rate, to minimize the risk of conducting an under-powered trial.

480 For the resistance sub-study, based on anecdotal data we estimated that 40% of subjects  
 481 receiving 14 days of treatment would acquire intestinal carriage of a drug-resistant Gram-  
 482 negative bacillus, compared to 20% of subjects receiving 7 days of treatment. Using a two-  
 483 sided alpha of 0.05, and 80% power, 91 subjects in each group (182 subjects total) will be  
 484 needed. This is 57% of the planned total enrollment, which we believe is feasible based on  
 485 our pre-trial planning.

486

## 487 **2.d. Inclusion and exclusion criteria**

488 Inclusion criteria (must have all)

489 1- Male gender

490 2- New-onset (within 7 days) of at least one of the following symptoms/findings: dysuria,  
 491 urinary frequency, urgency, hematuria, perineal pain, supra-pubic pain, costovertebral  
 492 angle tenderness, or flank pain

493 3- Treated as an outpatient (Primary Care Center or Emergency Department), with < 24  
 494 hours observation in the hospital or Emergency Department following the time of initial  
 495 diagnosis

496 4- Prescribed treatment with at least 7 days, but not more than 14 days, of either  
 497 ciprofloxacin or TMP-SMZ

498 Exclusion criteria (must have none)

499 1- Admission to the hospital (for > 24h) at the time of diagnosis

500 2- Documented fever at time of initial evaluation ( $\geq 38.0$  Celsius)

501 3- Previous enrollment in the study

- 502 4- Treatment for UTI in past 14 days
- 503 5- Not able to give informed consent
- 504 6- Unwilling to return for study visit
- 505 7- Symptoms thought more likely to be caused by a non-UTI diagnosis (e.g., urinary  
506 calculus, sexually transmitted infection, etc.)
- 507 8- Other antimicrobial therapy (new or ongoing) prescribed for a non-UTI diagnosis (e.g.,  
508 cellulitis, pneumonia, etc.)
- 509 9- Treatment initiated with an empiric antimicrobial to which the organism isolated in the  
510 urine culture is non-susceptible based on standard laboratory criteria
- 511 10- Treatment initiated with an empiric antimicrobial regimen that is underdosed, based on  
512 current guidelines and reviews

513 Inclusion criteria were selected to identify male patients with a symptomatic UTI, treated  
514 without hospitalization. Identifying patients with a symptomatic UTI (vs. asymptomatic  
515 bacteriuria) is crucial, since patients with asymptomatic bacteriuria cannot be expected to  
516 improve with antimicrobials, and thus their inclusion would bias the study towards finding no  
517 significant difference according to treatment duration. Although we anticipate that most  
518 subjects will have a urinalysis and urine culture performed, we have found that over 20% of  
519 subjects treated for UTI at the MVAMC are treated without one or the other test being  
520 obtained<sup>42</sup>. Accordingly, although we will record the results of any urine testing obtained,  
521 performance of urinalysis or culture will not be required for inclusion, although the study  
522 coordinator will work closely to increase the rates of urine culture ordering as part of  
523 enrolling patients through the involved clinics. Since UTI is largely a clinical diagnosis, with  
524 the culture being obtained mainly to help providers identify the causative pathogen and  
525 potentially adjust antimicrobial treatment, we believe that including patients without such  
526 urine testing (which reflects everyday practice) is appropriate.

527

528 Exclusion criteria were selected both to ensure patient safety and for statistical and practical  
529 reasons. Specifically, hospitalized patients are excluded because of their severity of illness,  
530 including a higher likelihood of bacteremia, which may require longer treatment duration  
531 and/or parenteral therapy. Patients previously enrolled in the study were excluded to ensure  
532 statistical independence. Patients prescribed less than 7 days of antimicrobial therapy are  
533 excluded since they will be difficult to identify before their treatment has ended. Patients  
534 prescribed more than 14 days of antimicrobial therapy are excluded because this generally  
535 indicates a patient being treated for suspected concomitant prostatitis, for which longer-  
536 duration therapy is beneficial<sup>6</sup>.

537

538 **2.e. Method of identifying potential subjects**

539 Patients with UTI symptoms will be identified at the time of their initial clinic nursing visit,  
 540 and the study coordinator will be notified by pager to come assess the patient for study  
 541 enrollment. The outpatient clinic areas of the MVAMC have been used for study recruitment  
 542 in the past, with good results. The study coordinator will regularly meet with clinic staff to  
 543 remind them to page the coordinator with patients presenting with UTI symptoms, and the  
 544 principle investigator will ask for cooperation from primary care clinicians through several  
 545 methods, including emails, announcements at staff meetings, and at a grand rounds on the  
 546 topic of male UTI (schedule pending, but 1 slot is assigned to the PI)

547 For patients presenting in off-tour hours (evenings, nights, weekends, and holidays), we have  
 548 established and piloted a system for rapidly identifying patients at the MVAMC who have  
 549 recently been diagnosed with UTI. This is essential, since success of the trial will depend on  
 550 identifying potential subjects, reviewing their eligibility status, contacting them, and  
 551 enrolling them before they have completed 7 days of treatment. In pre-trial planning, we used  
 552 the following codes to identify clinical encounters with a UTI diagnosis, listed here in  
 553 approximate order of frequency:

- 554 1) 599.0, UTI not otherwise specified
- 555 2) 788.41, urinary frequency
- 556 3) 788.1, dysuria
- 557 4) 788.63, urgency of urination
- 558 5) 599.70, hematuria not otherwise specified
- 559 6) 599.71, gross hematuria
- 560 7) 599.72, microscopic hematuria
- 561 8) 789.60, abdominal tenderness, unspecified site
- 562 9) 789.69, abdominal tenderness, other specific site
- 563 10) 608.9, male genital disease not otherwise specified

564  
 565 Using an “Outpatient Diagnosis/Procedure Code Search” function, we were able to  
 566 electronically search for these ICD-9 codes among all outpatient encounters at the MVAMC,  
 567 and can limit our searches to specific dates and clinics. In our pre-trial planning, we asked a  
 568 sample of patients about participation in a hypothetical study. Over 50% indicated that they  
 569 would be willing to participate, in principle, and over 1/3 were reasonably certain that they  
 570 would participate.

571  
 572 Assuming that actual enrollment proceeds at a similar rate to what these patients indicated,  
 573 this would give 0.66 subjects/day, or 4.5/week, for 239 total subjects enrolled per year, if >  
 574 50% of patients enroll. If only those who were “reasonably certain” of participation were to  
 575 enroll, this would give 0.41 subjects/day, or 2.9/week, for 151/year. If we conservatively  
 576 estimate that 50% of patients willing to participate will either reconsider or be unable to  
 577 participate for some other reason, this would give 0.33 subjects/day, or 2.3/week, for  
 578 119/year.

579  
 580 However, we do anticipate up to a 10% drop-off in enrollment per year, since patients are  
 581 only able to enroll in the study once, and our preliminary data suggests that up to 10% of UTI  
 582 episodes are due to patients who have been treated for a UTI within the past year. Thus,  
 583 using our most conservative estimate of enrolling 119 subjects in year 1, in year 2 we

584 anticipate this to decrease to 107 subjects, and in year 3 to 84 subjects. **This still would**  
585 **allow us to meet our enrollment goal at just over three years.** Thus, we are confident that  
586 we have a workable strategy to rapidly identify potential subjects, and sufficient patients who  
587 meet eligibility criteria and are willing to participate in the proposed trial for us to accrue the  
588 target sample size on schedule.

589

## 590 **2.f. Patient contact and enrollment**

591 After being identified as a potential subject (i.e., a man presenting with urinary symptoms)  
592 patients will be seen by the study coordinator in the clinic area, and the study will be  
593 explained to them in detail, and inclusion/exclusion criteria assessed. Eligible subjects  
594 willing to participate in the study will be consented and randomized to shorter vs. longer  
595 duration therapy, presuming that their provider subsequently ordered either ciprofloxacin or  
596 TMP-SMZ for 7 to 14 days.

597 Subjects not seen and evaluated on the day of treatment initiation will be contacted using the  
598 contact information listed in CPRS. In order to avoid “cold-calling” patients, all men  
599 presenting to the involved outpatient clinics with urinary symptoms will be provided an  
600 informational sheet regarding the study, and informing them that they may be contacted via  
601 telephone. A number to call to opt-out of such contact will be included.

602

## 603 **2.g. Sampling of the intestinal microbiota**

604 Subjects in the resistance sub-study will provide 2 samples of their intestinal microbiota, the  
605 first obtained via rectal swab performed by study staff at the time of enrollment, the second  
606 collected and submitted by mail 1 week after completion of study medication. Although  
607 obtaining a rectal swab is mildly invasive and may cause slight discomfort, it has been  
608 performed in numerous research studies and is part of routine clinical activity in many U.S.  
609 hospitals<sup>50</sup>. We anticipated that only a minority of subjects would agree to this sampling;  
610 however, during our mock-enrollment exercise we were surprised to find that 95% of the 19  
611 patients who agreed in principle to participate in the main trial also indicated willingness to  
612 participate in the resistance sub-study. Since is unlikely that patients will feel confident in  
613 their ability to collect their own rectal swabs, for the second sample we will ask them to swab  
614 a stool specimen and return the swab in a provided mailer, similar to the well-established  
615 practice of screening for colon cancer using home-collected fecal occult blood cards.

616 Swabs will be delivered to and processed in the research laboratory of Dr. James Johnson,  
617 which has extensive experience in the isolation, characterization, and storage of enteric  
618 bacteria, especially *E. coli*. For this study, the required microbiological techniques are  
619 relatively straightforward, and the number of samples per week modest, such that the time  
620 and space required for this sub-study will not be onerous. Swabs will be entered into a  
621 registry as they are received, with a study number used to link clinical and laboratory  
622 information. Swabs will be plated onto plain and antimicrobial-supplemented modified  
623 Mueller-Hinton agar plates (i.e., Mueller-Hinton agar containing bile salts and neutral red), to  
624 selectively recover and detect the lactose-fermentation characteristic of any Gram-negative



625 bacilli in the specimen, both generically and specifically those resistant to the included  
626 antimicrobials (i.e., ciprofloxacin and TMP-SMZ).

627 From plates yielding growth of Gram-negative bacilli, 1 representative of up to 3 of the most-  
628 numerous colony morphologies per plate will be identified to the species level using the API-  
629 20E system (BioMerieux, Durham, NC). Susceptibility to 22 antimicrobial agents will be  
630 determined by disk diffusion, using methods, control strains, and interpretive criteria as  
631 specific by the Clinical and Laboratory Standards Institute. For each Gram-negative bacillus  
632 isolated, a semi-quantitative measure of growth will be recorded. Specimens will be scored  
633 for presence of resistant organisms using four different endpoints: (1) any detectable Gram-  
634 negative bacilli, (2) any Gram-negative bacilli resistant to ciprofloxacin (or TMP-SMZ), (3)  
635 density of ciprofloxacin (or TMP-SMZ)-resistant Gram-negative bacilli, and (4) a Gram-  
636 negative bacilli resistance score, which will be the sum of all unique resistance markers  
637 detected among the various Gram-negative bacilli isolated from the specimen.

638

## 639 **2.h. Subject compensation**

640 Subjects will receive \$20 at the time of enrollment in the parent trial to compensate them for  
641 their travel and time commitment, regardless of whether they choose to participate in the  
642 resistance sub-study. Subjects enrolling in the resistance sub-study will receive an additional  
643 \$20 for the first fecal swab (obtained at the study visit), and an additional \$30 for the second  
644 fecal swab. The higher compensation for the second swab reflects the extra effort and  
645 inconvenience subjects may experience with collecting and mailing the sample. This yields a  
646 maximum possible compensation of \$70.

647

## 648 **2.i. Potential complications during therapy**

649 During treatment for their UTI episode, subjects may experience a number of possible  
650 unexpected events, some of which could represent complications of the antimicrobials they  
651 are receiving. It is unknown whether treatment duration will affect the frequency or severity  
652 of any of these events. The most common adverse drug events associated with antimicrobial  
653 therapy include nausea, vomiting, diarrhea, dizziness, and headache. Less frequently  
654 encountered adverse drug events include allergic reactions (including rash, renal injury, and  
655 anaphylaxis), *C. difficile* infection, and increased or decreased effect of other medications,  
656 including warfarin. Because subjects are not being assigned to specific antimicrobials by  
657 study personnel, extensive discussion regarding the potential harms of the antimicrobial their  
658 provider prescribed is beyond the scope of the study. Instead, at the enrollment visit study  
659 personnel will briefly review potential generic harms of antimicrobials, will inform patients  
660 that treatment duration may or may not influence the probability of experiencing any harms,  
661 and will remind subjects to report any adverse events to their primary care provider or the  
662 MVAMC Emergency Department. A further assessment of adverse drug events will be  
663 conducted during each study contact, with the details of any reported potential harms being  
664 recorded.

665

## 666 **2.j. Follow-up and outcome assessment**

667 Follow-up telephone contacts will occur at four time points, i.e., (i) on or about the time of  
668 medication cessation, (ii) 7 ( $\pm$  2) days after medication cessation, (iii) 14 ( $\pm$  2) days after  
669 medication cessation and (iv) 28 ( $\pm$  2) days after medication cessation.

670 (i) The first contact is primarily to assess for medication adherence and any adverse drug  
671 effects. Study personnel will inquire regarding adherence and will screen for adverse drug  
672 events, both via an open-ended question and by specifically inquiring regarding the common  
673 symptoms of nausea, vomiting, diarrhea, dizziness, headache, and drug allergy. Subjects will  
674 be encouraged to refer to their symptom diary to ensure accurate recall.

675 (ii) At the second contact (7 days after medication cessation, either 7 or 14 days after the last  
676 dose of active antimicrobial), **resolution of UTI symptoms (the primary outcome)** will be  
677 assessed. Additionally, adverse events will again be assessed, and subjects will be asked  
678 whether there has been interval retreatment for UTI. Subjects in the resistance sub-study will  
679 be reminded during this call to obtain and return a stool swab in the provided mailer.

680 (iii) At the third contact (14 days after medication cessation, either 14 or 21 days after the last  
681 dose of active antimicrobial), resolution of UTI symptoms will again be assessed, and  
682 subjects will again be asked about adverse events and interval retreatment for UTI. After  
683 unblinding, the assessment occurring 14 days after the last dose of active antimicrobial will  
684 be used for analysis.

685 (iv) The fourth contact (28 days after medication cessation) will again include an assessment  
686 of adverse drug events and an inquiry as to any retreatment for UTI. All subjects having  
687 reported initial resolution of their UTI symptoms will be assessed for the secondary outcome  
688 of recurrent UTI, defined as recurrence of UTI symptoms and receipt of antimicrobial  
689 treatment.

690 If at any time subjects report new or unresolved UTI symptoms, symptoms consistent with *C.*  
691 *difficile* infection, or any other potential complication of antimicrobial therapy, they will be  
692 directed to seek medical care from their primary provider or the MVAMC Emergency  
693 Department. Severity of reported adverse events will be assessed and recorded (see section  
694 2.m)

695

## 696 **2.k. Safety and monitoring**

697 Subject-specific safety monitoring will be performed via symptom review during the  
698 telephone contacts. Additionally, subjects will be given contact information for the primary  
699 investigator and the study coordinator, and will be encouraged to contact study personnel if  
700 any suspected adverse events occur between scheduled study calls, in addition to contacting  
701 their primary care provider or the MVAMC Emergency Department. Serious adverse events  
702 will be reported by study personnel to the local Institutional Review Board (IRB) per  
703 MVAMC policy, and each such event will be reviewed by the IRB to determine whether it  
704 was potentially study-related. Monitoring to detect an excess of clinical outcomes or adverse  
705 events in either arm (including treatment failure for the initial UTI, recurrence of UTI, and

706 adverse drug events, including *C. difficile* infection) will be performed by an independent  
707 DSMB that will include at least one biostatistician with clinical trial experience.

708 Study records will be maintained within the MVAMC on a secure research drive, accessible  
709 only to the research team. Any paper records will be stored in a locked file cabinet in the  
710 principal investigator's locked office (3B-126).

## 711 **2.1. Definitions for safety and monitoring.**

712 *Adverse event: an adverse event (AE)* is any untoward medical occurrence associated with  
713 the antimicrobial treatment, whether or not the event is considered related to the  
714 antimicrobial.

715 *Adverse reaction:* any adverse event caused by antimicrobial treatment.

716 *Suspected adverse reaction (SAR):* any adverse event for which there is a reasonable  
717 possibility that the antimicrobial treatment caused the adverse event. "Reasonable  
718 possibility" means there is evidence to suggest a causal relationship between the  
719 antimicrobial treatment and the adverse event. Suspected adverse reaction implies a lesser  
720 degree of certainty about causality than "adverse reaction," which means any adverse event  
721 caused by the antimicrobial treatment.

722 *Serious adverse event (SAE) or serious suspected adverse reaction:* An adverse event or  
723 suspected adverse reaction is considered "serious" if, in the view of either the investigator, or  
724 the IRB, it results in any of the following outcomes:

- 725 -Death
- 726 -Life-threatening adverse event
- 727 -Inpatient hospitalization for  $\geq 24$  hours or prolongation of an existing hospitalization
- 728 -Persistent or significant incapacity or substantial disruption of the ability to conduct
- 729 normal life functions

730  
731 Important medical events that may not result in death, be life-threatening, or require  
732 hospitalization may be considered serious when, based upon appropriate medical judgment,  
733 they may jeopardize the subject and may require medical or surgical intervention to prevent  
734 one of the outcomes listed in this definition.

735  
736 *Unexpected adverse event or unexpected suspected adverse reaction:* an adverse event or  
737 suspected adverse reaction is considered "unexpected" if it is not listed in the protocol.

738 *Life-threatening:* An adverse event or suspected adverse reaction that places the subject at  
739 immediate risk of death. It does not include an AE or SAR that, had it occurred in a more  
740 severe form, might have caused death.

## 741 **2.m. Anticipated adverse events**

742 The following lists anticipated adverse events:

- 743 -Diarrhea

- 744 -Nausea  
 745 -Vomiting  
 746 -Headache  
 747 -Drug allergy  
 748 -Pain at tendon insertions  
 749 -Blood sugar fluctuations among diabetic patients

750

751 Note that failure to resolve UTI symptoms (i.e., not meeting the primary outcome), is not  
 752 considered an adverse event, but rather will be recorded in the assessment of the primary  
 753 outcome. Severity of adverse events will be determined using a severity scale (grade 0-5)  
 754 adapted from the Common Terminology Criteria for Adverse Events, version 4.0, as listed  
 755 below.

756

| Adverse event                                                                           | Grade                                                                                            |                                                                                                         |                                                                                                                                                                           |                                                                                                          |       |
|-----------------------------------------------------------------------------------------|--------------------------------------------------------------------------------------------------|---------------------------------------------------------------------------------------------------------|---------------------------------------------------------------------------------------------------------------------------------------------------------------------------|----------------------------------------------------------------------------------------------------------|-------|
|                                                                                         | 1                                                                                                | 2                                                                                                       | 3                                                                                                                                                                         | 4                                                                                                        | 5     |
| Diarrhea                                                                                | Increase of <4 stools per day over baseline; mild increase in ostomy output compared to baseline | Increase of 4 - 6 stools per day over baseline; moderate increase in ostomy output compared to baseline | Increase of $\geq 7$ stools per day over baseline; incontinence; hospitalization indicated; severe increase in ostomy output compared to baseline; limiting self care ADL | Life-threatening consequences; urgent intervention indicated, intensive care unit utilization            | Death |
| <i>C. difficile</i> infection (diarrhea with a positive assay for <i>C. difficile</i> ) | Increase of <4 stools per day over baseline; mild increase in ostomy output compared to baseline | Increase of 4 - 6 stools per day over baseline; moderate increase in ostomy output compared to baseline | Increase of $\geq 7$ stools per day over baseline; incontinence; hospitalization indicated; severe increase in ostomy output compared to baseline; limiting self care ADL | Life-threatening consequences; urgent intervention indicated, intensive care unit utilization, colectomy | Death |
| Nausea                                                                                  | Loss of appetite without alteration in eating habits                                             | Oral intake decreased without significant weight loss,                                                  | Inadequate oral caloric or fluid intake; tube feeding, TPN, or                                                                                                            | NA                                                                                                       | NA    |

|                                         |                                                   |                                                         |                                                                                                                                       |                                                              |       |
|-----------------------------------------|---------------------------------------------------|---------------------------------------------------------|---------------------------------------------------------------------------------------------------------------------------------------|--------------------------------------------------------------|-------|
|                                         |                                                   | dehydration or malnutrition                             | hospitalization indicated                                                                                                             |                                                              |       |
| Vomiting                                | 1 - 2 episodes (separated by 5 minutes) in 24 hrs | 3 - 5 episodes (separated by 5 minutes) in 24 hrs       | >=6 episodes (separated by 5 minutes) in 24 hrs; tube feeding, TPN or hospitalization indicated                                       | Life-threatening consequences; urgent intervention indicated | Death |
| Headache                                | Mild pain                                         | Moderate pain; limiting instrumental ADL                | Severe pain; limiting self care ADL                                                                                                   | NA                                                           | NA    |
| Drug allergy                            | Mild rash, no alteration of daily activities      | Moderate rash, treated with topical or oral medications | Symptomatic bronchospasm, with or without urticaria; parenteral intervention indicated; allergy-related edema/angioedema; hypotension | Life-threatening consequences; urgent intervention indicated | Death |
| Hypoglycemia (among diabetic patients)  | < lower limit of normal – 55 mg/dL                | <55 – 40 mg/dL                                          | <40 – 30 mg/dL                                                                                                                        | <30 mg/dL; life-threatening consequences, seizures           | Death |
| Hyperglycemia (among diabetic patients) | >ULN - 160 mg/dL                                  | >160 - 250 mg/dL                                        | >250 - 500 mg/dL                                                                                                                      | >500 mg/dL, life-threatening consequences                    | Death |

757  
758  
759  
760  
761  
762  
763

## 2.n. Statistical methods

**Primary outcome: resolution of UTI symptoms 14 days after completing active antimicrobial therapy.** This outcome will be assessed in a binary manner. **Subjects with**

764 **persistent UTI symptoms or having received further antimicrobials because of UTI**  
765 **symptoms will be considered to have not met the primary outcome, whereas those**  
766 **without persistent UTI symptoms and not having received further antimicrobials will**  
767 **be considered to have met the primary outcome.** The proportion of subjects meeting the  
768 primary outcome will be compared between the 2 treatment groups using a per-protocol  
769 analysis, with subjects analyzed according to which treatment they received. An intention-to-  
770 treat analysis will be performed as a secondary analysis. Subjects reporting taking 7 or fewer  
771 days of study medication will be analyzed as having received shorter-duration therapy,  
772 whereas subjects reporting taking 8 or more days of study medication will be analyzed as  
773 having received longer-duration therapy. Non-inferiority testing of the differences in the  
774 group proportions of symptom resolution will be done using a z-statistic derived by the  
775 adaptive percentage non-inferiority margin approach described by Laster and Johnson<sup>51, 52</sup>.  
776 Exploratory sub-group analysis using multiple logistic regression will be performed to assess  
777 outcomes stratified by the following putatively clinically relevant characteristics: catheter-  
778 associated UTI, functional or mechanical urinary tract obstruction, and diabetes. We  
779 anticipate that the proposed study will be under-powered for these analyses, and thus they  
780 will primarily be used as pilot data to identify potential specialized populations for future  
781 study.

782  
783 **Secondary outcome (1): recurrence rates at 28 days after completing study medication.**

784 The proportion of subjects reporting recurrence of symptomatic UTI (defined as for the study  
785 entry criteria, but occurring after the primary outcome assessment) in each group will be  
786 calculated, along with corresponding 95% confidence intervals. Between-group comparisons  
787 will be made using the Chi-square test.

788  
789 **Secondary outcome (2): incidence of any adverse drug events in the 28 days after**  
790 **completing study medication.**

791 The incidence of adverse drug events, including nausea, vomiting, diarrhea, dizziness,  
792 headache, drug allergy, and *C. difficile* infection, both individually and in aggregate, will be  
793 compared between treatment groups. For subjective symptoms, subjects will be asked to use  
794 their symptom diary to quantify the number of days they experienced each adverse event.  
795 Severity will be determined using a severity scale (grade 0-5) adapted from the Common  
796 Terminology Criteria for Adverse Events, version 4.0. Adverse events will be analyzed first  
797 as whether a subject experienced any adverse drug event vs. none (Chi-square test), and then  
798 by comparing the number of days on which each subjective event was experienced (Mann-  
799 Whitney U-test). Cases of suspected drug allergy will be reviewed by 2 Infectious Disease  
800 staff physicians (who are blinded to study group assignment) to assess: certainty of allergy  
801 diagnosis, relatedness to the prescribed antimicrobial, and clinical severity, based on  
802 information collected by study personnel and contained in the medical record. Subjects  
803 having a history of prior *C. difficile* infection will be recorded, but will not be excluded from  
804 analysis since these patients are a small but important subgroup, for which guidance  
805 regarding therapy duration is of particular interest. The randomization process should help  
806 ensure that there is no imbalance in such patients between treatment groups.

807

808 **Secondary outcome (3): intestinal carriage of antimicrobial-resistant Gram-negative**  
 809 **bacilli after completing study medication, as compared to a baseline sample taken early**  
 810 **in treatment.**

811 For the resistance sub-study, the outcomes of interest are (i) the proportion of subjects who  
 812 develop newly detected intestinal carriage of antimicrobial-resistant Gram-negative bacilli  
 813 between the baseline sample during treatment and the sample obtained 7 days after  
 814 completing study medication (Chi-square test), (ii) the density of antimicrobial-resistant  
 815 Gram-negative bacilli among samples with any growth (t-test or Mann-Whitney U-test,  
 816 depending on the frequency distributions), and (iii) the overall resistance score, defined as  
 817 the total number of antimicrobials which at least one of the isolated Gram-negative bacilli is  
 818 resistant to (t-test or Mann-Whitney U-test).

819

## 820 2.o. Proposed timetable

| Pre-study                                              | Year 1                         | Year 2                     | Year 3                     | Year 4                              |
|--------------------------------------------------------|--------------------------------|----------------------------|----------------------------|-------------------------------------|
| IRB approval                                           | Purchase supplies              | Patient enrollment         | Patient enrollment         | Complete enrollment                 |
| Create database and case-report forms                  | Hire personnel                 | Process rectal/stool swabs | Process rectal/stool swabs | Data analysis                       |
| Educate and coordinate with clinic staff and providers | Patient enrollment             |                            | Data analysis              | Presentation/publication of results |
|                                                        | Process rectal/stool swabs     |                            |                            |                                     |
|                                                        | Assess rate of subject accrual |                            |                            |                                     |

821

822 **3. Summary**

823 We propose a single-center, randomized, double-blind, placebo-controlled trial of treatment  
 824 duration for male UTI, which is a common but relatively understudied infectious disease in the  
 825 VA population. The results of this study will allow clinicians to make an evidence-based  
 826 treatment decision regarding an extremely common clinical condition among male veterans  
 827 and non-veterans. This could help preserve the efficacy of valuable antimicrobials during a  
 828 time of steadily increasing antimicrobial resistance and protect future male patients from  
 829 insufficient or excessive antimicrobial therapy for their UTI.

830

831 **4. References**

- 832 1. Griebing TL. Urinary Tract Infection in Men. In: Litwin MS, Saigal CS, eds. *Urologic*  
833 *Diseases in America*. Washington, DC: US Government Printing Office; 2007:623- 645.
- 834 2. Griebing TL. Urologic diseases in america project: trends in resource use for urinary  
835 tract infections in men. *J Urol*.2005;173(4):1288-1294.
- 836 3. Drekonja DM, Rector TS, Cutting A, Johnson JR. Urinary Tract Infection in Male  
837 Veterans: Treatment Patterns and Outcomes. *Arch Intern Med*.2012:1-7.
- 838 4. Ulleryd P, Sandberg T. Ciprofloxacin for 2 or 4 weeks in the treatment of febrile urinary  
839 tract infection in men: a randomized trial with a 1 year follow-up. *Scand J Infect*  
840 *Dis*.2003;35(1):34-39.
- 841 5. Dow G, Rao P, Harding G, et al. A prospective, randomized trial of 3 or 14 days of  
842 ciprofloxacin treatment for acute urinary tract infection in patients with spinal cord  
843 injury. *Clin Infect Dis*.2004;39(5):658-664.
- 844 6. Lipsky BA. Prostatitis and urinary tract infection in men: what's new; what's true? *Am J*  
845 *Med*.1999;106(3):327-334.
- 846 7. Nicolle LE. A practical guide to antimicrobial management of complicated urinary tract  
847 infection. *Drugs Aging*.2001;18(4):243-254.
- 848 8. Drekonja DM, Johnson JR. Urinary tract infections. *Prim Care*.2008;35(2):345-367, vii.
- 849 9. Loo VG, Poirier L, Miller MA, et al. A predominantly clonal multi-institutional outbreak  
850 of *Clostridium difficile*-associated diarrhea with high morbidity and mortality. *N Engl J*  
851 *Med*.2005;353(23):2442-2449.
- 852 10. Kelly CP, Pothoulakis C, LaMont JT. *Clostridium difficile* colitis. *N Engl J*  
853 *Med*.1994;330(4):257-262.
- 854 11. Boucher HW, Talbot GH, Bradley JS, et al. Bad bugs, no drugs: no ESKAPE! An update  
855 from the Infectious Diseases Society of America. *Clin Infect Dis*.2009;48(1):1-12.
- 856 12. Gupta K, Hooton TM, Roberts PL, Stamm WE. Short-course nitrofurantoin for the  
857 treatment of acute uncomplicated cystitis in women. *Arch Intern*  
858 *Med*.2007;167(20):2207-2212.
- 859 13. Gupta K, Hooton TM, Naber KG, et al. International clinical practice guidelines for the  
860 treatment of acute uncomplicated cystitis and pyelonephritis in women: A 2010 update by  
861 the Infectious Diseases Society of America and the European Society for Microbiology  
862 and Infectious Diseases. *Clin Infect Dis*.2011;52(5):e103-120.
- 863 14. Raz R, Chazan B, Kennes Y, et al. Empiric use of trimethoprim-sulfamethoxazole (TMP-  
864 SMX) in the treatment of women with uncomplicated urinary tract infections, in a  
865 geographical area with a high prevalence of TMP-SMX-resistant uropathogens. *Clin*  
866 *Infect Dis*.2002;34(9):1165-1169.
- 867 15. Talan DA, Stamm WE, Hooton TM, et al. Comparison of ciprofloxacin (7 days) and  
868 trimethoprim-sulfamethoxazole (14 days) for acute uncomplicated pyelonephritis  
869 pyelonephritis in women: a randomized trial. *JAMA*.2000;283(12):1583-1590.
- 870 16. Peterson J, Kaul S, Khashab M, Fisher AC, Kahn JB. A double-blind, randomized  
871 comparison of levofloxacin 750 mg once-daily for five days with ciprofloxacin 400/500  
872 mg twice-daily for 10 days for the treatment of complicated urinary tract infections and  
873 acute pyelonephritis. *Urology*.2008;71(1):17-22.
- 874 17. Hooton TM, Roberts PL, Stapleton AE. Cefpodoxime vs ciprofloxacin for short-course  
875 treatment of acute uncomplicated cystitis: a randomized trial. *JAMA*.2012;307(6):583-  
876 589.



- 877 **18.** Fosfomycin for urinary tract infections. *Med Lett Drugs Ther.* 1997;39(1005):66-68.
- 878 **19.** Redelings MD, Sorvillo F, Mascola L. Increase in *Clostridium difficile*-related mortality  
879 rates, United States, 1999-2004. *Emerg Infect Dis.* 2007;13(9):1417-1419.
- 880 **20.** McFarland LV. Update on the changing epidemiology of *Clostridium difficile*-associated  
881 disease. *Nat Clin Pract Gastroenterol Hepatol.* 2008;5(1):40-48.
- 882 **21.** McDonald LC, Owings M, Jernigan DB. *Clostridium difficile* infection in patients  
883 discharged from US short-stay hospitals, 1996-2003. *Emerg Infect Dis.* 2006;12(3):409-  
884 415.
- 885 **22.** Severe *Clostridium difficile*-associated disease in populations previously at low risk--four  
886 states, 2005. *MMWR Morb Mortal Wkly Rep.* 2005;54(47):1201-1205.
- 887 **23.** Tamma PD, Turnbull AE, Milstone AM, Lehmann CU, Sydnor ER, Cosgrove SE.  
888 Ventilator-associated tracheitis in children: does antibiotic duration matter? *Clin Infect*  
889 *Dis.* 2011;52(11):1324-1331.
- 890 **24.** Chastre J, Wolff M, Fagon JY, et al. Comparison of 8 vs 15 days of antibiotic therapy for  
891 ventilator-associated pneumonia in adults: a randomized trial. *JAMA.* 2003;290(19):2588-  
892 2598.
- 893 **25.** Nordenstam GR, Brandberg CA, Oden AS, Svanborg Eden CM, Svanborg A. Bacteriuria  
894 and mortality in an elderly population. *N Engl J Med.* 1986;314(18):1152-1156.
- 895 **26.** Johnson JR, Clabots C, Kuskowski MA. Multiple-host sharing, long-term persistence,  
896 and virulence of *Escherichia coli* clones from human and animal household members. *J*  
897 *Clin Microbiol.* 2008;46(12):4078-4082.
- 898 **27.** Johnson JR, Owens K, Gajewski A, Clabots C. *Escherichia coli* colonization patterns  
899 among human household members and pets, with attention to acute urinary tract  
900 infection. *J Infect Dis.* 2008;197(2):218-224.
- 901 **28.** van de Sande-Bruinsma N, Grundmann H, Verloo D, et al. Antimicrobial drug use and  
902 resistance in Europe. *Emerg Infect Dis.* 2008;14(11):1722-1730.
- 903 **29.** Barbosa TM, Levy SB. The impact of antibiotic use on resistance development and  
904 persistence. *Drug Resist Updat.* 2000;3(5):303-311.
- 905 **30.** Johnson L, Sabel A, Burman WJ, et al. Emergence of fluoroquinolone resistance in  
906 outpatient urinary *Escherichia coli* isolates. *Am J Med.* 2008;121(10):876-884.
- 907 **31.** Gerding DN, Johnson S, Peterson LR, Mulligan ME, Silva J, Jr. *Clostridium difficile*-  
908 associated diarrhea and colitis. *Infect Control Hosp Epidemiol.* 1995;16(8):459-477.
- 909 **32.** Drekonja DM, Amundson WH, Decarolis DD, Kuskowski MA, Lederle FA, Johnson JR.  
910 Antimicrobial use and risk for recurrent *Clostridium difficile* infection. *Am J*  
911 *Med.* 2011;124(11):1081 e1081-1087.
- 912 **33.** Fowler S, Webber A, Cooper BS, et al. Successful use of feedback to improve antibiotic  
913 prescribing and reduce *Clostridium difficile* infection: a controlled interrupted time series.  
914 *J Antimicrob Chemother.* 2007;59(5):990-995.
- 915 **34.** O'Connor KA, Kingston M, O'Donovan M, Cryan B, Twomey C, O'Mahony D.  
916 Antibiotic prescribing policy and *Clostridium difficile* diarrhoea. *QJM.* 2004;97(7):423-  
917 429.
- 918 **35.** Ludlam H, Brown N, Sule O, Redpath C, Coni N, Owen G. An antibiotic policy  
919 associated with reduced risk of *Clostridium difficile*-associated diarrhoea. *Age*  
920 *Ageing.* 1999;28(6):578-580.
- 921 **36.** Cohen SH, Gerding DN, Johnson S, et al. Clinical practice guidelines for *Clostridium*  
922 *difficile* infection in adults: 2010 update by the society for healthcare epidemiology of

- 923 America (SHEA) and the infectious diseases society of America (IDSA). *Infect Control*  
 924 *Hosp Epidemiol.*2010;31(5):431-455.
- 925 **37.** Hepburn MJ, Dooley DP, Skidmore PJ, Ellis MW, Starnes WF, Hasewinkle WC.  
 926 Comparison of short-course (5 days) and standard (10 days) treatment for uncomplicated  
 927 cellulitis. *Arch Intern Med.*2004;164(15):1669-1674.
- 928 **38.** Stamm WE, McKeivitt M, Counts GW. Acute renal infection in women: treatment with  
 929 trimethoprim-sulfamethoxazole or ampicillin for two or six weeks. A randomized trial.  
 930 *Ann Intern Med.*1987;106(3):341-345.
- 931 **39.** Sandberg T, Skoog G, Hermansson AB, et al. Ciprofloxacin for 7 days versus 14 days in  
 932 women with acute pyelonephritis: a randomised, open-label and double-blind, placebo-  
 933 controlled, non-inferiority trial. *Lancet.*2012;380(9840):484-490.
- 934 **40.** Hooton TM. The current management strategies for community-acquired urinary tract  
 935 infection. *Infect Dis Clin North Am.*2003;17(2):303-332.
- 936 **41.** Hooton TM, Stamm WE. Diagnosis and treatment of uncomplicated urinary tract  
 937 infection. *Infect Dis Clin North Am.*1997;11(3):551-581.
- 938 **42.** Drekonja DM, Okoye NC, Kuskowski MA, Johnson JR. Appropriateness of urinary tract  
 939 infection diagnosis and treatment duration. *Arch Intern Med.*2010;170(5):489-490.
- 940 **43.** Shehab N, Patel PR, Srinivasan A, Budnitz DS. Emergency department visits for  
 941 antibiotic-associated adverse events. *Clin Infect Dis.*2008;47(6):735-743.
- 942 **44.** DeMets DL, Lan KK. Interim analysis: the alpha spending function approach. *Stat*  
 943 *Med.*1994;13(13-14):1341-1352; discussion 1353-1346.
- 944 **45.** Arav-Boger R, Leibovici L, Danon YL. Urinary tract infections with low and high colony  
 945 counts in young women. Spontaneous remission and single-dose vs multiple-day  
 946 treatment. *Arch Intern Med.*1994;154(3):300-304.
- 947 **46.** Ferry SA, Holm SE, Stenlund H, Lundholm R, Monsen TJ. The natural course of  
 948 uncomplicated lower urinary tract infection in women illustrated by a randomized  
 949 placebo controlled study. *Scand J Infect Dis.*2004;36(4):296-301.
- 950 **47.** Ronald AR, Harding GK. Complicated urinary tract infections. *Infect Dis Clin North*  
 951 *Am.*1997;11(3):583-592.
- 952 **48.** Ulleryd P. Febrile urinary tract infection in men. *Int J Antimicrob Agents.*2003;22 Suppl  
 953 2:89-93.
- 954 **49.** van Nieuwkoop C, van't Wout JW, Assendelft WJ, et al. Treatment duration of febrile  
 955 urinary tract infection (FUTIRST trial): a randomized placebo-controlled multicenter trial  
 956 comparing short (7 days) antibiotic treatment with conventional treatment (14 days).  
 957 *BMC Infect Dis.*2009;9:131.
- 958 **50.** Johnson JR, Delavari P. Concurrent fecal colonization with extraintestinal pathogenic  
 959 *Escherichia coli* in a homosexual man with recurrent urinary tract infection and in his  
 960 male sex partner. *Clin Infect Dis.*2002;35(6):E65-68.
- 961 **51.** Laster LL, Johnson MF, Kotler ML. Non-inferiority trials: the 'at least as good as'  
 962 criterion with dichotomous data. *Stat Med.*2006;25(7):1115-1130.
- 963 **52.** Laster LL, Johnson MF. Non-inferiority trials: the 'at least as good as' criterion. *Stat*  
 964 *Med.*2003;22(2):187-200.
- 965
- 966
