# Supplementary material
Source: PubMed Central journal article supplement (PMC8317010)
Supplement: jama-e219899-s002.pdf [file jama-e219899-s002.pdf]

1 **Seven vs. 14 Days Treatment for Male Urinary Tract Infection**

2

3

4

5 A randomized placebo-controlled trial of 7 vs. 14 days of antimicrobial treatment for men with  
6 UTI

7

8 **Sponsor:** VA Merit Review, award #1I01CX000830-01A2

9

10 **Intervention:** 7 days of antimicrobial treatment (ciprofloxacin or  
11 trimethoprim/sulfamethoxazole) followed by 7 days of placebo vs. 14 days of antimicrobial  
12 treatment

13 Principal Investigator: Dimitri Drekonja, MD, MS

14 Co-Investigator, and Michael E. DeBakey VAMC site investigator: Barbara Trautner, MD, PhD

15

16 Protocol version: 9.0

17

|    |                                             |      |
|----|---------------------------------------------|------|
| 18 | Table of contents                           | Page |
| 19 | 1. Introduction                             | 3    |
| 20 | a. Background                               | 3    |
| 21 | b. Preliminary studies and current status   | 5    |
| 22 | 2. Research design and methods              | 8    |
| 23 | a. Study type                               | 8    |
| 24 | b. Summary of study description             | 8    |
| 25 | c. Details of specific study areas          | 11   |
| 26 | d. Inclusion and exclusion criteria         | 14   |
| 27 | e. Method of identifying potential subjects | 15   |
| 28 | f. Patient contact and enrollment           | 16   |
| 29 | g. Sampling of the intestinal microbiota    | 17   |
| 30 | h. Subject compensation                     | 18   |
| 31 | i. Potential complications during therapy   | 18   |
| 32 | j. Follow-up and outcome assessment         | 19   |
| 33 | k. Safety and monitoring                    | 19   |
| 34 | l. Definitions for safety and monitoring    | 20   |
| 35 | m. Anticipated adverse events               | 21   |
| 36 | n. Statistical methods                      | 23   |
| 37 | o. Proposed timetable                       | 24   |
| 38 | 3. Summary                                  | 25   |
| 39 | 4. References                               | 26   |
| 40 |                                             |      |

## 41 1. Introduction

### 42 1.a. Background

43 Urinary tract infection occurring in males (hereafter, male UTI) is a common infection  
44 among both hospitalized and ambulatory men. Most patients are treated in the outpatient  
45 setting, with only a minority requiring hospitalization<sup>1,2</sup>. Data from the 2000 National  
46 Ambulatory Medical Care Survey demonstrate that male UTI led to 1.8 million annual office  
47 visits and 420,000 annual Emergency Department visits in the U.S.<sup>1,2</sup>. Within the VA health  
48 care system, over 33,000 non-hospitalized men have at least one UTI episode in a 12-month  
49 period<sup>3</sup>. Treatment is typically with oral antimicrobials, for durations ranging from 3 days to  
50 several weeks.

51 Few data from randomized trials are available to guide treatment duration for male UTI. At  
52 one extreme of the treatment duration spectrum, a Scandinavian study found no significant  
53 difference in clinical cure or recurrence rates among men with febrile UTI randomized to 14  
54 vs. 28 days of ciprofloxacin<sup>4</sup>. At the other end of the spectrum, in a study of UTI treatment  
55 duration among patients with spinal cord injury (85% male), 3 days treatment yielded a  
56 higher rate of symptomatic relapse than did 14 days treatment, in both short and long-term  
57 follow-up<sup>5</sup>. No other randomized clinical trials are available that directly assess the impact of  
58 duration of treatment for male UTI on efficacy; accordingly, the conventional  
59 recommendation to treat for 7-14 days is based largely on expert opinion<sup>6-8</sup>. Currently, 7, 10,  
60 and 14-day antimicrobial courses are commonly used to treat UTI in male veterans UTI<sup>3</sup>.

61 In addition to the lack of evidence regarding optimal treatment duration, two well-  
62 documented trends are making management of male UTI progressively more challenging.  
63 First, Gram-negative bacilli, the causative microorganisms for most UTIs, are becoming  
64 increasingly resistant to most relevant antimicrobials; consequently, few reliably active oral  
65 agents are available for UTI therapy, which is often initiated empirically, before culture  
66 results are known. Second, *Clostridium difficile* infection, which is almost invariably  
67 precipitated by antimicrobial use, is increasingly frequent and severe<sup>9,10</sup>.

68 Increasing antimicrobial resistance among Gram-negative bacilli. Antimicrobial resistance  
69 among Gram-negative bacilli, a major public health threat, has attracted considerable  
70 attention from governmental organizations, professional societies, and leaders in the field of  
71 infectious diseases<sup>11</sup>. Perversely, as resistance among Gram-negative bacilli has increased,  
72 the development of new antimicrobials that target these organisms has decreased<sup>11</sup>.

73 The problem of Gram-negative resistance is particularly relevant for treating UTI, because  
74 the vast majority of UTIs are caused by enteric Gram-negative bacilli, in particular  
75 *Escherichia coli*, but also *Klebsiella* species, *Enterobacter* species, and others<sup>8,12</sup>. Guidelines  
76 recommend that when the local prevalence of susceptibility to a particular drug among  
77 uropathogens falls below 80%, that drug should no longer be used as empiric therapy for  
78 UTI<sup>13,14</sup>. Currently, many locations, including the MVAMC, have *E. coli* susceptibility rates  
79 of only 65-70% for both ciprofloxacin and trimethoprim-sulfamethoxazole (TMP-SMZ)  
80 (MVAMC antibiogram, January 2012 through June 2012). These drugs are traditional  
81 cornerstones of UTI treatment in the ambulatory setting because of their excellent oral

82 bioavailability and their track record of tolerability and effectiveness across most types of  
83 UTI, including febrile UTI and pyelonephritis<sup>15, 16</sup>. In contrast, alternative oral agents,  
84 including  $\beta$ -lactams, nitrofurantoin, and fosfomycin, have inferior efficacy ( $\beta$ -lactams,  
85 fosfomycin)<sup>17, 18</sup> and/or achieve low tissue drug levels (nitrofurantoin, fosfomycin)<sup>13, 18</sup>,  
86 limiting their appeal for UTI therapy, especially for patients with fever or clinical  
87 manifestations suggesting pyelonephritis<sup>13, 18</sup>.

88 The rising prevalence of resistance to ciprofloxacin and TMP-SMZ has led providers to use  
89 broader-spectrum empirical therapy, such as a parenteral dose of a more predictably active  
90 agent combined with empiric oral ciprofloxacin or TMP-SMZ. This practice adds to the  
91 selective pressure for the development of antimicrobial resistance, thereby causing future  
92 infections to be even more difficult to treat.

93 Increased incidence and severity of *Clostridium difficile* infection. Beginning in the early  
94 2000's, an increasing incidence and severity of *C. difficile* infection was observed, first in  
95 Canada and subsequently worldwide<sup>9, 10, 19, 20</sup>. Multiple factors have been proposed to explain  
96 these increases, including increased antimicrobial use, emergence of a new fluoroquinolone-  
97 resistant strain of *C. difficile* during a time of increased fluoroquinolone use, increased  
98 sporulation and toxin production by this epidemic strain, and better recognition and diagnosis  
99 of *C. difficile* infection on the part of clinicians<sup>9, 10</sup>. Whatever the explanation, *C. difficile*  
100 now rivals methicillin-resistant *Staphylococcus aureus* as the leading cause of nosocomial  
101 infections<sup>21</sup>, and is also increasingly prevalent in the community<sup>22</sup>. Thus, efforts to decrease  
102 its incidence, including through reduced antimicrobial use, are urgently needed.

103 Relationship between antimicrobial use, antimicrobial resistance, and *C. difficile* infection.  
104 The relationship between antimicrobial use and subsequent antimicrobial resistance is  
105 complicated. First, although some patient-level studies have demonstrated the development  
106 of resistance during or after receipt of antimicrobial therapy<sup>23-25</sup>, in clinical practice the link  
107 between past antimicrobial use and subsequent infection with a drug-resistant organism is  
108 difficult to prove. Additionally, most patients in whom a resistant organism emerges do not  
109 develop a subsequent drug-resistant infection, but rather become carriers of resistant  
110 organisms as part of their normal bacterial microbiota. Because carriage of resistant  
111 microorganisms is a clinically silent phenomenon, this is an under-recognized harm of  
112 antimicrobial use. However, the fecal microbiota serves as the source of many infections,  
113 including UTIs. In addition, microorganisms can spread easily among household contacts,  
114 thus increasing the population at risk for infection with a resistant organism<sup>26, 27</sup>. Countries  
115 with high levels of antimicrobial use typically have correspondingly high rates of  
116 antimicrobial resistance among clinical isolates, as compared with countries with lower  
117 levels of use<sup>28, 29</sup>. Similarly, individual centers have documented a temporal relationship  
118 between antimicrobial use and antimicrobial resistance, with increased use being followed  
119 shortly thereafter by a corresponding increase in resistance<sup>30</sup>.

120 Antimicrobial use is also closely linked to *C. difficile* infection, almost all cases of which are  
121 preceded by antimicrobial therapy. Increased antimicrobial use is associated with increased  
122 *C. difficile* infection<sup>31, 32</sup>, and reduced antimicrobial use has been used successfully to combat  
123 outbreaks of *C. difficile* infection<sup>33-35</sup>. Accordingly, a joint Clinical Practice Guideline for *C.*  
124 *difficile* infection from the Society for Healthcare Epidemiology of America and the

125 Infectious Disease Society of America recommends limiting the duration of antimicrobial  
126 therapy a way to decrease the incidence of *C. difficile* infection<sup>36</sup>.

127 In summary, antimicrobial use is associated with increases in antimicrobial resistance and *C.*  
128 *difficile* infection; therefore, effective strategies to minimize unnecessary antimicrobial use  
129 are urgently needed. One potential method to decrease unnecessary antimicrobial use is to  
130 define the minimal effective treatment duration for various diseases, and to use this minimal  
131 duration routinely. This approach has been successfully applied to other infectious diseases,  
132 including ventilator-associated tracheitis<sup>23</sup>, ventilator-associated pneumonia<sup>24</sup>, and  
133 cellulitis<sup>37</sup>. For these disorders, shorter-duration treatment performed as well as longer-  
134 duration treatment, and in the respiratory infections was associated with less colonization and  
135 infection with drug-resistant microorganisms, with or without a trend toward lower mortality-  
136 -without any reduction in efficacy. For male UTI, if 14 days of therapy yields no clinically  
137 relevant benefit to that observed with 7 days of therapy, but induces greater resistance in a  
138 similar manner as seen in the studies of ventilator-associated pneumonia and tracheitis, then  
139 patients treated longer are exposed to potential harms without any benefit. Alternatively, if  
140 longer-duration treatment does provide benefits, then a substantial proportion of men with a  
141 UTI are being treated for an inappropriately short duration, and may be experiencing worse  
142 symptom control and increased rates of recurrence. Accordingly, we propose to conduct a  
143 randomized clinical trial to investigate whether 7 days of antimicrobial treatment is non-  
144 inferior to 14 days of antimicrobial treatment for men with a UTI.

145

#### 146 **1.b. Preliminary studies and current status**

147 Historically, UTIs in both males and females were treated with longer courses of  
148 antimicrobials than are commonly used today, ranging from 7 days for simple cystitis (i.e.,  
149 bladder infection or lower-tract disease), to up to 6 weeks for pyelonephritis (i.e., kidney  
150 infection or upper-tract disease), which is more serious but also comparatively uncommon<sup>38</sup>.  
151 UTI treatment has been studied much more extensively in women than in men; consequently,  
152 optimal treatment durations are more clearly defined for women than for men<sup>13</sup>. In women,  
153 cystitis can be treated effectively with 3 days of a fluoroquinolone or TMP-SMZ, 5 days of  
154 nitrofurantoin, or a single dose of fosfomycin tromethamine; likewise, pyelonephritis can be  
155 treated effectively with 5 days of high-dose levofloxacin, 7 days of standard-dose  
156 ciprofloxacin, or 14 days of TMP-SMZ<sup>13, 39</sup>.

157 In contrast, little is known regarding the optimal treatment duration for male UTI. This is due  
158 in part to the paucity of randomized trials, as compared to UTI in women. It also relates to  
159 the additional structures present in the male genitourinary tract, including the prostate gland,  
160 epididymis, and seminal vesicles, involvement of which is hypothesized to necessitate  
161 longer-duration therapy, since they may serve as sanctuaries or reservoirs from which  
162 residual bacteria can emerge and cause a recurrent infection<sup>6</sup>. Also complicating efforts to  
163 identify the optimal treatment duration in men is the broader range of entities that constitute  
164 the full spectrum of male UTI. Such syndromes range from simple cystitis (manifested as  
165 voiding symptoms in the absence of constitutional manifestations, including fever), to febrile  
166 UTI (voiding symptoms with documented fever), to pyelonephritis (fever with flank pain,

167 with or without voiding symptoms). Finally, UTIs can be categorized as complicated vs.  
168 uncomplicated. Although consensus is lacking as to which specific conditions define a UTI  
169 as being “complicated,” the accepted underlying principle is that these are factors that, when  
170 present, make UTI more likely to occur, more difficult to treat successfully, and less  
171 predictable as to microbiological etiology<sup>7, 8, 40</sup>. Published reviews have recommended  
172 longer-duration treatment for complicated male UTI, but because these recommendations are  
173 based largely on expert opinion, and because of disagreement as to what constitutes a  
174 complicated UTI, they confuse more than clarify the issue of optimal treatment duration.

175 Previous clinical trials. The most robust evidence for treatment duration in the field of male  
176 UTI comes from a non-blinded Scandinavian trial of 114 men with febrile UTI who were  
177 randomized to receive 14 vs. 28 days of ciprofloxacin<sup>4</sup>. All patients experienced resolution of  
178 signs and symptoms of infection during therapy, and cure rates (defined as remaining  
179 symptom-free for two weeks after treatment cessation) were not significantly different  
180 between groups (92% vs. 97%, respectively)<sup>4</sup>. Notably, however, treatment durations less  
181 than 14 days were not investigated, and this trial included only men with febrile UTI, a  
182 syndrome that although clinically important is relatively uncommon.

183 Most men diagnosed with UTI are afebrile, but instead experience new onset of dysuria,  
184 frequency, and/or supra-pubic tenderness<sup>41</sup>. The presence of fever is thought to represent  
185 some component of invasive disease, which presumably can be localized within the prostate,  
186 kidney, or other tissues, although in practice the actual primary focus is rarely sought or  
187 defined, since such knowledge confers no known clinical benefit. Thus, the finding that 14  
188 days of therapy for febrile male UTI performed as well as did 28 days suggests that for men  
189 with the less severe UTI syndrome of cystitis extending the duration of treatment beyond 14  
190 days is unlikely to be beneficial.

191 At the other end of the treatment duration spectrum, in a trial of UTI treatment among spinal  
192 cord injury patients, the 60 subjects (85% male, all without fever) were randomized to  
193 receive 3 vs. 14 days of ciprofloxacin<sup>5</sup>. Although clinical cure (defined as resolution of  
194 symptoms by 19-23 days after treatment initiation) was not significantly different between  
195 the 3 and 14-day treatment groups (63% vs. 53%, respectively), relapse was significantly  
196 more common in the 3-day group (33% vs. 0%;  $P = .001$ )<sup>5</sup>. This suggests that 3 days of  
197 treatment may be insufficient for UTI in men with spinal cord injuries, and perhaps also--  
198 although this has not been specifically studied-- in other men.

199 Previous observational studies. Observational data indicate that in practice the treatment  
200 duration used for male UTI varies significantly, and may influence the likelihood of both  
201 recurrence and adverse events. At the MVAMC, we retrospectively examined the records of  
202 225 patients (90% male) diagnosed with UTI in 2007-8 for (i) appropriateness of the  
203 diagnosis and the associated treatment duration and (ii) clinical outcome<sup>42</sup>. Treatment  
204 durations ranged from 3 to 14 days among men and women alike. Notably, among the 152  
205 men with complicated UTI, recurrence was significantly more common among those treated  
206 for only 3-7 days, compared with 10-14 days (35% vs. 17%;  $P = .02$ )<sup>42</sup>. This indicates that  
207 for men with complicated UTI (75% of the study population), shorter-duration therapy may  
208 predispose to recurrent infection.

209 In a separate study using VA administrative data for FY2009, we identified 33,336 unique  
210 male veterans treated for UTI, defined as having a diagnostic code for UTI combined with a  
211 prescription for an antimicrobial typically used for UTI<sup>3</sup>. Of these men, 35% received 7 or  
212 fewer days of treatment, whereas the remaining 65% received more than 7 days of treatment.  
213 Recurrence rates were not appreciably different between patients receiving shorter- vs.  
214 longer-duration treatment (3.9% vs. 4.2%, respectively,  $P = .16$ ). However, subsequent *C.*  
215 *difficile* infection was significantly more common among patients receiving longer-duration  
216 treatment. That is, whereas in the total population *C. difficile* infection occurred in 144  
217 (0.4%) of the 33,336 UTI patients, it occurred in only 0.3% of patients receiving shorter-  
218 duration ( $\leq 7$ d) treatment, compared to 0.5% of those receiving longer-duration ( $> 7$ d)  
219 treatment ( $P = .02$ ). With multivariable adjustment for age, Charlson comorbidity score, and  
220 UTI-specific comorbidities (prostatic hypertrophy, urinary calculi, etc), a borderline  
221 significant trend persisted toward increased *C. difficile* infection with treatment durations  
222 greater than 7 days (odds ratio 1.42, 95% confidence interval 0.97 to 2.07). Thus, longer-  
223 duration therapy was not associated with a reduction in recurrence, but may be associated  
224 with increased *C. difficile* infection.

225 Adverse drug events. Adverse drug events are an increasingly recognized consequence of  
226 antimicrobial use. Using active surveillance, the percentage of antimicrobial-treated subjects  
227 who report adverse events has been as high as 30%<sup>15-17</sup>. Commonly reported adverse events  
228 are generally mild, and include nausea, diarrhea, headache, and dizziness. However, more  
229 serious adverse drug events, including allergy, *C. difficile* infection, and interactions with  
230 other medications also occur with antimicrobial use, and are frequent enough such that  
231 antimicrobials are the cause of up to 20% of adverse drug events diagnosed in emergency  
232 departments<sup>43</sup>. Although some adverse drug events, such as anaphylaxis, are unlikely to be  
233 affected by treatment duration, many others, including nausea, diarrhea, *C. difficile* infection,  
234 headache, and dizziness, conceivably could be reduced or avoided by use of shorter-duration  
235 therapy. The issue of adverse drug events has become more important given the recent  
236 warning by the US Food and Drug Administration that use of fluoroquinolone antimicrobials  
237 is associated with musculoskeletal and nervous system adverse events  
238 (<http://www.fda.gov/Drugs/DrugSafety/ucm500143.htm>). Thus, determining the shortest  
239 possible treatment duration for male UTI, a common cause of fluoroquinolone use, is  
240 increasingly important.

241 In summary, the available observational and clinical trial evidence indicates that for male  
242 UTI 28 days therapy offers no demonstrable clinical benefit over 14 days, even within the  
243 febrile UTI subset, whereas a much shorter treatment duration, e.g., 3 days, may increase the  
244 risk of recurrent UTI, even among men with less severe UTI syndromes. This suggests that  
245 the optimal treatment duration should be longer than 3 days, but not longer than 14 days,  
246 which comports with current recommendations for 7-14 days of treatment. However, *C.*  
247 *difficile* infection may be more frequent among patients treated for more than 7 days,  
248 compared to 7 days or fewer. Minor adverse drug events are common with UTI treatment,  
249 but whether their frequency is influenced by treatment duration is unknown. Additionally,  
250 although the effect of treatment duration on intestinal carriage of antimicrobial-resistant  
251 organisms is unknown for UTI, in other infectious diseases longer treatment durations have  
252 been associated with increased colonization and infection with drug-resistant organisms,  
253 compared with shorter treatment durations. Thus, since longer treatment may have

254 demonstrable harms, apart from the obvious cost and convenience issues, for longer-duration  
255 treatment to be justified it should confer demonstrable clinical benefit. Accordingly, a  
256 randomized trial of shorter vs. longer-duration treatment for male UTI is needed, to  
257 determine whether 7 days of treatment is non-inferior to 14 days of treatment.

## 258 **2. Research design and methods**

259

### 260 **2.a. Study type**

261 We propose to conduct a randomized, double-blind, placebo-controlled trial to determine  
262 whether, among men with UTI, 7 days of antimicrobial treatment is non-inferior to 14 days  
263 of treatment for resolution of UTI symptoms. The proposed trial will randomize 290 men  
264 with UTI to 7 vs. 14 days of treatment. Antimicrobial selection will be at the discretion of the  
265 treating clinician. The primary endpoint will be resolution of pre-therapy UTI symptoms, as  
266 assessed 14 days after the last dose of active antimicrobial. Secondary outcomes will include  
267 intestinal carriage of antimicrobial-resistant Gram-negative bacilli, recurrence of  
268 symptomatic UTI, and adverse drug events.

269

### 270 **2.b. Summary of study description**

271 The study was initially proposed as a single site study, conducted at the Minneapolis VA  
272 Health Care System, which includes the Minneapolis VA Medical Center and the affiliated  
273 Community Based Outpatient Clinics(CBOCs). To address slow enrollment, a second site  
274 (the Michael E. DeBakey Veterans Affairs Medical Center [MEDVAMC] and their affiliated  
275 CBOCs) has been approved by the VA Merit Review Program. Any changes to the protocol  
276 and consent will be initiated by the PI, and MEDVAMC IRB approval must be sought prior  
277 to implementing changes at that site, except when necessary to eliminate apparent immediate  
278 hazards to the subject. To minimize the possibility that the decision to participate is  
279 influenced by the initial duration of therapy prescribed, every effort will be made to enroll  
280 patients prior to their being prescribed antimicrobial treatment. This will be done by close  
281 collaboration with nurse-managers in the clinics and by having the study coordinator screen  
282 for eligible patients. Additionally, because we are intervening only on treatment duration,  
283 and all enrolled patients will receive at least 7 days of antimicrobial treatment, we will be  
284 able to identify and enroll patients seen during off-hours, or those who were missed during  
285 regular hours, several days after their initial clinical presentation, but before they have  
286 completed 7 days of treatment. Thus, although we plan to enroll the majority of patients at  
287 the time of initiating therapy, we will be able to recruit sufficient numbers of subjects without  
288 needing to maintain the multiple shifts of study personnel typically needed to enroll patients  
289 presenting during evening, night, or weekend hours.

290 Potential subjects will be identified by the chief complaint elicited by the intake nurses in the  
291 outpatient clinics and urgent care, and by notifications/reports from the pharmacy service  
292 regarding new UTI prescriptions (if such reports are able to be generated). Nurse managers  
293 or physicians will add study coordinator as a signer on CPRS record and give patient an “opt  
294 out” flyer when patients with symptoms of dysuria, urinary frequency, urgency, hematuria,



295 perineal pain, supra-pubic pain, costovertebral angle tenderness, or flank pain come into  
296 hospital. The nurse managers of the involved clinics have indicated that this would not overly  
297 burden their staff or resources. Patients presenting with UTI during evening, night,  
298 weekends, or holidays will be identified by searching recent outpatient clinic encounters for  
299 the specific diagnostic codes relevant to UTI. Each day, study staff will review the list of  
300 patients newly assigned any of these codes, i.e., the potential subjects, and their medical  
301 records to determine (i) the validity of the UTI diagnosis and (ii) whether the patient meets  
302 eligibility criteria, as detailed below.

303 Patients who pass this screen will be contacted, will receive a brief study description, and  
304 will be invited to a study visit at which study participation will be further discussed. The visit  
305 must occur before the patient completes 7 days of treatment and will be conducted in person  
306 at the participating study site or via mail. Patients will be asked to bring their current  
307 antimicrobial with them, if they meet with study staff in person. At the visit,  
308 inclusion/exclusion criteria will be verified, any questions will be answered, and written  
309 informed consent will be obtained. Patients at the MVAMC (and possibly later at the  
310 MEDVAMC) will also be invited to participate in a sub-study that investigates the effect of  
311 treatment duration on the intestinal carriage of antimicrobial-resistant Gram-negative bacilli  
312 (hereafter, resistance sub-study). After providing consent, subjects will be randomized to 7  
313 vs. 14 days of antimicrobial treatment (of the same agent their provider prescribed for them),  
314 and will exchange days 8-14 of their current medication for a special medication supply  
315 provided by the study. All medications provided by the patients will be collected and  
316 returned to the study site's research pharmacy for disposal when possible. Patients who  
317 complete study visit via mail, will be instructed to dispose of days 8-14 of their original  
318 prescription and use only the study medication. Subjects will be provided with a notebook  
319 and will be instructed to record in it their UTI symptoms and any potential adverse drug  
320 events, to facilitate accurate recall during follow-up.

321 The special medication supply to be given to the subjects will be a 7-day pill container  
322 loaded with a sufficient supply of medication to complete a 14-day course of treatment when  
323 combined with the clinically prescribed medication, which will be used for days 1-7. For  
324 example, a patient with a study visit that falls on day 4 of treatment will take their clinically  
325 prescribed antimicrobials through day 7, and will complete treatment using the 7-day supply  
326 of study medication for days 8-14. We will enroll only patients treated initially with  
327 ciprofloxacin and TMP-SMZ, which are used to treat over 90% of male VA patients with  
328 UTI<sup>3</sup>. In addition to being the most frequently used medications for male UTI, both agents  
329 are highly bioavailable with oral administration, and achieve excellent penetration into the  
330 male genitourinary tract (6, 8). Study medications (both active antimicrobial and placebo)  
331 will be different in appearance from clinically prescribed medication. Both subjects and  
332 investigators will be blinded to duration of active antimicrobial therapy. Patients who cannot  
333 attend the study visit in person will have the medication for days 8-14 mailed to them using  
334 overnight delivery after the research pharmacist receives the signed consent and HIPAA  
335 authorization forms.

336 After enrollment, subjects will be contacted by telephone on or about the scheduled day of  
337 medication completion, and again at days 7, 14, and 28 ( $\pm 2$ ) after medication completion.  
338 On the day of medication cessation, study staff will verify medication adherence (by patient

339 report) and will inquire regarding the presence of (i) UTI symptoms, (ii) signs or symptoms  
340 of *C. difficile* infection, (iii) other adverse drug events, and (iv) possible infectious  
341 complications (retreatment, receipt of care outside the VA system, etc.). Adverse drug events  
342 will be elicited first via an open-ended question, then by inquiring specifically regarding a  
343 list of typical antimicrobial-related adverse drug events symptoms such as nausea, vomiting,  
344 diarrhea, dizziness, rash, thrush, and headache. Similar assessments (excluding medication  
345 adherence) will be performed at 7, 14, and 28 days after stopping study medication.

346 Resolution of UTI symptoms, the primary outcome, will be assessed 7 and 14 ( $\pm 2$ ) days after  
347 completing medication. However, after study completion and unblinding of treatment  
348 allocation, the outcome assessment corresponding to 14 days after last receipt of active  
349 antimicrobial will be used for analysis. That is, for subjects in the shorter-duration group, the  
350 7 day assessment will be used, whereas for subjects in the longer-duration group, the 14 day  
351 assessment will be used, such that all subjects are assessed 14 days after their last dose of  
352 active antimicrobial. Additionally, with the 7 days post-treatment call, subjects in the  
353 resistance sub-study will be reminded to obtain a stool swab and to return it using the  
354 provided mailer. After the final (28d) follow-up call, subjects will have completed their  
355 participation in this study. If at any time subjects report new or unresolved UTI symptoms, or  
356 symptoms consistent with *C. difficile* infection or other adverse drug events, they will be  
357 directed to seek medical care from their primary care provider or the MVAMC or  
358 MEDVAMC Emergency Department.

359 A 3-member data safety monitoring board (DSMB) will be formed to oversee the safety of  
360 this trial, assisted by a biostatistician with experience in clinical trials. Under the direction of  
361 the DSMB, the biostatistician will conduct 2 interim analyses, when approximately 33% and  
362 66% of the planned 290 subjects have been evaluated for the primary endpoint. An alpha-  
363 spending function approach as described by Lan & DeMets is proposed<sup>44</sup>, testing for both  
364 non-inferiority and futility. Additionally, rates of adverse events in the treatment groups will  
365 be monitored by the DSMB, and reported to the MVAMC institutional review board.

366 After enrollment and follow-up are concluded, and laboratory testing complete, results will  
367 be analyzed using a per-protocol analysis, with subjects analyzed according to which  
368 treatment they received. An intention-to-treat analysis will be performed as a secondary  
369 analysis. We will test our primary hypothesis that 7 days of antimicrobial treatment is non-  
370 inferior to 14 days of treatment for the resolution of UTI symptoms by comparing the  
371 proportion of subjects in each group reporting resolution of pre-therapy UTI symptoms at 14  
372 days after completing active antimicrobial therapy. For the purposes of statistical power  
373 calculation, treatment inferiority is defined as  $>10\%$  efficacy between treatment groups. A  
374 sample size of 290 subjects (145/group) was calculated, using a one-sided alpha level of  
375 0.025 and power of 85%, to allow detection of a minimum clinically significant absolute  
376 difference of 10% (e.g., 90% for 14-day treatment, vs. 80% for 7-day treatment). To adjust  
377 for potential loss of subjects to follow-up, we initially increased our enrollment goal by 10%  
378 (29 subjects), for a total sample size of 319, but have since opted to remove this 10% margin  
379 as there has been no loss to follow-up to date.

380 Both treatment groups will be assumed to be superior to no treatment, based on prior studies  
381 of UTI demonstrating that spontaneous cure occurs in a minority (7-28%) of subjects<sup>45, 46</sup>.  
382 Accordingly, it would be unethical to include a placebo-only treatment group.

383

384 **2.c. Details of specific study areas**

385 Selection of treatment duration. Our decision to compare 7 vs. 14 days treatment duration  
386 was based on prior studies<sup>4, 5, 15</sup>, the range of current expert recommendations<sup>7, 8, 47</sup>, and  
387 current practice within the VA system (unpublished data)<sup>4</sup>. The choice of 14 days for the  
388 longer-duration treatment arm was relatively straightforward. As outlined in the “prior  
389 clinical trials” section above, 14 days was the shorter duration arm in the Swedish study that  
390 found no significant efficacy difference between 14 vs. 28 days of treatment<sup>4</sup>. Also, 14 days  
391 frequently appears in reviews as the upper-limit of recommended treatment duration for male  
392 UTI<sup>7, 8, 40, 47</sup>. Finally, among 33,000 male UTI episodes treated in the VA system in fiscal  
393 year 2009, only a small minority (8%) received more than 14 days of therapy<sup>3</sup>.

394 In contrast, the choice of 7 days for the shorter-duration treatment arm was more difficult,  
395 since no prior clinical trial of male UTI has used this duration. However, since the 3 vs. 14-  
396 day study by Dow et al. among spinal cord injury patients showed a statistically significant  
397 increased risk of symptomatic recurrence among subjects receiving 3 days of treatment, we  
398 believe that there is not clinical equipoise between 3 and 14 days treatment duration. This  
399 belief is reinforced by our own observational data from the MVAMC showing an increase in  
400 recurrence among subjects receiving shorter-duration treatment (as discussed above), and the  
401 fact that experts typically offer only guarded endorsement for the possibility of using 3-day  
402 therapy (which is widely accepted as appropriate for women with uncomplicated cystitis) for  
403 treating male UTI, and even then only in young, otherwise healthy men with no complicating  
404 conditions<sup>40</sup>.

405 Although 7 days is a widely recommended lower-limit of treatment duration for male UTI<sup>7, 8,</sup>  
406 <sup>40</sup>, in our VA administrative data of male UTI treatment, we observed that 10 days of  
407 treatment was actually more common than 7 days, which might suggest that a 10-day  
408 duration should be studied. However, if we were to compare 10 vs. 14-day therapy, a  
409 between-arm treatment duration difference of only 4 days would make our groups prone to  
410 crossover contamination, with those allocated to 14 days of treatment needing to miss only a  
411 few doses of antimicrobials to merge with the 10-day group. Additionally, the favorable  
412 impact on resistance selection, *C. difficile* infection, and other adverse drug events of a 4-day  
413 (29%) reduction in treatment duration is likely to be less than with a 7-day (50%) reduction.  
414 Therefore, we selected 7 days for the shorter-duration treatment arm.

415 Blinding. Because our primary outcome is subjective (i.e., patient symptom reports), we are  
416 planning to blind participants, investigators, and clinicians to the duration of active treatment,  
417 to minimize potential bias that could be introduced if patients knew that they were receiving  
418 shorter-duration treatment. There are difficulties inherent to this approach. First, since we are  
419 proposing to randomize subjects only to different treatment durations (not to different  
420 antimicrobials), we are not in control over which antimicrobials will be prescribed.  
421 Fortunately, 90% of diagnosed outpatient male UTIs in the VA system, both nationally and at  
422 the MVAMC, are treated with ciprofloxacin (65%) or TMP-SMZ (25%)<sup>3</sup>. The remaining  
423 10% are treated with a wide variety of agents, including nitrofurantoin, cephalexin,  
424 amoxicillin, amoxicillin/clavulanate, etc. We opted to include only patients receiving  
425 ciprofloxacin and TMP-SMZ, since the other antimicrobials are used so infrequently that no

426 valid outcome comparisons could be made, and some are dosed more than the twice-daily  
427 ciprofloxacin and TMP-SMZ, increasing the burden on our research pharmacy.

428 To achieve double-blinding, all patients will take their clinically prescribed medications on  
429 days 1-7. However, all patients will receive study medication for days 8-14. Specifically, all  
430 patients will be given a supply of medication that is different in appearance from their  
431 clinically prescribed medication for days 8-14. This different-appearing medication will be  
432 either:

433 1) active antibiotic (ciprofloxacin or TMP/SMZ, based on what they were initially  
434 prescribed) from an alternate manufacturer, different in both color and imprint from the  
435 clinically prescribed drug, or

436 2) a placebo tablet, similar in size to both the antimicrobials (approximately 1 gram), that  
437 will be provided by the VA Cooperative Study Pharmacy in Albuquerque, New Mexico.

438 Thus, all subjects will receive pills that are different in appearance from the initial antibiotic  
439 for days 8-14, effectively blinding their allocation. Because there is a possibility of subjects  
440 unblinding themselves by using pill-identifier websites, an assessment of blinding will be  
441 performed, using a validated blinding index. Of note, similar trials have used  
442 overencapsulation to blind participants<sup>15</sup>, a method that can be foiled by patients simply  
443 removing the gelatin capsule. Research pharmacy staff will prepare 4 different types of  
444 containers with these tablets. The containers for the longer-duration subjects will contain  
445 ciprofloxacin or TMP-SMZ for days 8-14, and the study coordinator will instruct the patient  
446 to use their clinically supplied drug for days 1-7. Those for the shorter-duration subjects will  
447 contain placebo for days 8-14, with again the clinically supplied drug used for days 1-7.

448 The logistics of blinding are as follows: at enrollment, the study coordinator will notify the  
449 pharmacy that a patient has been enrolled, and whether ciprofloxacin or TMP-SMZ is being  
450 used. Since we are stratifying based on catheter use (see below), the coordinator will inform  
451 the pharmacy to use the randomization schedule appropriate to the patient's catheter status  
452 and antimicrobial received. Working from this randomization schedule, the pharmacy will  
453 send a prepared container with study drug for days 8-14 to the appropriate location, with  
454 neither the study coordinator nor the patient knowing whether the tablets are antimicrobial or  
455 placebo. The research pharmacies at the MVAMC and MEDVAMC will be charged with  
456 tracking and dispensing study medications, a function that they routinely provide for other  
457 double-blinded studies. The research pharmacy staff can also unblind the patient in the event  
458 of a clinical emergency for which unblinding is deemed necessary. Criteria for unblinding  
459 will be admission to the hospital for suspected urosepsis or severe drug reaction, or any other  
460 scenario as directed by the local institutional review board, which reviews all study-related  
461 serious adverse events. The effectiveness of blinding will be assessed by asking patients  
462 which treatment they think they received 7 days after completing the study medication.

463 Randomization. Randomization will be used to ensure that baseline characteristics, including  
464 any potential confounders, are equally distributed between the 2 treatment groups. To ensure  
465 relatively equal sample size between the shorter and longer therapy duration groups, block  
466 randomization will be used. However, since the proposed sample size is 290 subjects, it is  
467 possible that uncommon factors may be unevenly distributed with a simple 1:1

468 randomization plan. Accordingly, we plan to stratify our randomization by presence of  
469 urinary catheter use, a potential confounder that occurs in approximately 10% of male UTI  
470 patients at the MVAMC (unpublished data). This will create 2 strata, each of which will have  
471 its own randomization schedule, using permuted blocks of 4. Separate randomization tables  
472 will be used at the MVAMC and MEDVAMC to avoid any confusion with multiple  
473 randomizations occurring in a short time, and to obviate the need to wait for a randomization  
474 slot from the MVAMC. Urinary catheter use is relatively uncommon, but is hypothesized by  
475 some authorities to require longer-duration therapy<sup>40, 48</sup>. Thus, by allocating this factor in a  
476 relatively equal distribution we will ensure that outcomes are not affected by an imbalance in  
477 this potentially more difficult-to-treat form of male UTI. Although we initially planned to  
478 enroll patients with febrile UTI, because of reviewer concerns, and an ongoing Dutch study  
479 specifically addressing treatment duration in men with febrile UTI<sup>49</sup>, we have opted to forego  
480 including patients with febrile UTI. Since less than 2% of subjects treated in the outpatient  
481 setting for male UTI are febrile (unpublished data), this should not significantly affect our  
482 enrollment.

483 Sample size calculations. To determine an appropriate sample size, we first established the  
484 minimum significant difference in the primary outcome (resolution of UTI symptoms) that  
485 would be clinically relevant. Literature review identified UTI studies that used absolute  
486 differences of 10% to 20% for the minimum significant difference<sup>4, 15, 49</sup>. Separately, we  
487 queried four international UTI experts as to what difference in treatment success they would  
488 view as clinically significant. The range of their responses was also 10-20%, with a mean of  
489 12.5%. Using the conservative lower-limit (10%) as the minimum significant difference the  
490 proposed study should be able to detect, and a percentage of subjects experiencing resolution  
491 of symptoms with 14 days therapy of 90%<sup>4</sup>, we then calculated a total sample size of 290  
492 subjects needed to detect such a difference with 85% power, using a one-sided alpha of  
493 0.025. Accordingly, a group size of 145 subjects (290 total) would provide 85% power to  
494 detect a 10% absolute between-group difference in the primary outcome (i.e., 90% vs. 80%).  
495 As mentioned, the additional 10% of patients originally built in to account for loss to follow-  
496 up is considered unnecessary, as there have been no losses to follow-up at the first interim  
497 analysis.

498 The above calculation assumes a conservative 90% for the outcome of resolution of UTI  
499 symptoms. However, in the trial of men with febrile UTI, resolution occurred in 92% (14d)  
500 and 97% (28d) of subjects. If we were to assume that 95% of subjects will have resolution of  
501 symptoms, instead of the more conservative 90%, then the total number of subjects needed to  
502 achieve 85% power to detect a 10% absolute between-group difference in the primary  
503 outcome would decrease. However, this may be an overly optimistic projection. Accordingly,  
504 we have planned our study using the more conservative assumption of a 90% symptom  
505 resolution rate, to minimize the risk of conducting an under-powered trial.

506 For the resistance sub-study, based on anecdotal data we estimated that 40% of subjects  
507 receiving 14 days of treatment would acquire intestinal carriage of a drug-resistant Gram-  
508 negative bacillus, compared to 20% of subjects receiving 7 days of treatment. Using a two-  
509 sided alpha of 0.05, and 80% power, 91 subjects in each group (182 subjects total) will be  
510 needed. This is 57% of the planned total enrollment, which we believe is feasible based on  
511 our pre-trial planning. To simplify the logistics of adding a second site, the MEDVAMC will

512 not enroll patients into the sub-study, unless this is changed via an amendment to the protocol  
 513 after study activities have commenced.

514

515 **2.d. Inclusion and exclusion criteria**

516 Inclusion criteria (must have all). With the addition of the MEDVAMC as a second site,  
 517 there will be significant efforts to ensure that enrollment there is consistent with enrollment  
 518 at the MVAMC. This will include communication between study coordinators, investigator  
 519 oversight, and weekly calls during the study roll-out phase at the MEDVAMC. These are  
 520 deemed necessary since there is some degree of judgement needed as to determining whether  
 521 documented symptoms meet inclusion criteria (for instance, whether “pain in the lower back  
 522 and side” qualifies as “flank pain”).

523 1- Male gender

524 2- New-onset (within 7 days) of at least one of the following symptoms/findings: dysuria,  
 525 urinary frequency, urgency, hematuria, perineal pain, supra-pubic pain, costovertebral  
 526 angle tenderness, or flank pain

527 3- Treated as an outpatient (Primary Care Center or Emergency Department), with < 24  
 528 hours observation in the hospital or Emergency Department following the time of initial  
 529 diagnosis

530 4- Prescribed treatment with at least 7 days, but not more than 14 days, of either  
 531 ciprofloxacin or TMP-SMZ

532 Exclusion criteria (must have none)

533 1- Admission to the hospital (for > 24h) at the time of diagnosis

534 2- Documented fever at time of initial evaluation ( $\geq 38.0$  Celsius)

535 3- Previous enrollment in the study

536 4- Treatment for UTI in past 14 days

537 5- Not able to give informed consent

538 6- Unwilling to either:

539 a. return for study visit

540 b. participate in a home visit

541 c. participate via mail

542 7- Symptoms thought more likely to be caused by a non-UTI diagnosis (e.g., urinary  
 543 calculus, sexually transmitted infection, etc.)

544 8- Other antimicrobial therapy (new or ongoing) prescribed for a non-UTI diagnosis (e.g.,  
545 cellulitis, pneumonia, etc.)

546 9- Treatment initiated with an empiric antimicrobial to which the organism isolated in the  
547 urine culture is non-susceptible based on standard laboratory criteria

548 10- Treatment initiated with an empiric antimicrobial regimen that is underdosed, based on  
549 current guidelines and reviews

550 Inclusion criteria were selected to identify male patients with a symptomatic UTI, treated  
551 without hospitalization. Identifying patients with a symptomatic UTI (vs. asymptomatic  
552 bacteriuria) is crucial, since patients with asymptomatic bacteriuria cannot be expected to  
553 improve with antimicrobials, and thus their inclusion would bias the study towards finding no  
554 significant difference according to treatment duration. Although we anticipate that most  
555 subjects will have a urinalysis and urine culture performed, we have found that over 20% of  
556 subjects treated for UTI at the MVAMC are treated without one or the other test being  
557 obtained<sup>42</sup>. Accordingly, although we will record the results of any urine testing obtained,  
558 performance of urinalysis or culture will not be required for inclusion, although the study  
559 coordinator will work closely to increase the rates of urine culture ordering as part of  
560 enrolling patients through the involved clinics. Since UTI is largely a clinical diagnosis, with  
561 the culture being obtained mainly to help providers identify the causative pathogen and  
562 potentially adjust antimicrobial treatment, we believe that including patients without such  
563 urine testing (which reflects everyday practice) is appropriate.

564

565 Exclusion criteria were selected both to ensure patient safety and for statistical and practical  
566 reasons. Specifically, hospitalized patients are excluded because of their severity of illness,  
567 including a higher likelihood of bacteremia, which may require longer treatment duration  
568 and/or parenteral therapy. Patients previously enrolled in the study were excluded to ensure  
569 statistical independence. Patients prescribed less than 7 days of antimicrobial therapy are  
570 excluded since they will be difficult to identify before their treatment has ended. Patients  
571 prescribed more than 14 days of antimicrobial therapy are excluded because this generally  
572 indicates a patient being treated for suspected concomitant prostatitis, for which longer-  
573 duration therapy is beneficial<sup>6</sup>.

574

## 575 **2.e. Method of identifying potential subjects**

576 Patients with UTI symptoms will be identified at the time of their initial clinic nursing visit,  
577 and the study coordinator will be notified and patient given the “opt out” flyer. The  
578 outpatient clinic areas of the MVAMC and MEDVAMC have been used for study  
579 recruitment in the past, with good results. The study coordinators will regularly meet with  
580 clinic staff to remind them of the UTI trial, and the principal investigator at the MVAMC and  
581 the co-investigator at the MEDVAMC will ask for cooperation from primary care clinicians  
582 through several methods, including emails, announcements at staff meetings, and other  
583 meetings.

584 For patients presenting in off-tour hours (evenings, nights, weekends, and holidays), we have  
585 established and piloted a system for rapidly identifying patients at the MVAMC who have  
586 recently been diagnosed with UTI. Using Vista, diagnostic codes relevant to UTI will be  
587 searched to identify potential participants. This is essential, since success of the trial will  
588 depend on identifying potential subjects, reviewing their eligibility status, contacting them,  
589 and enrolling them before they have completed 7 days of treatment. Using an “Outpatient  
590 Diagnosis/Procedure Code Search” function, we were able to electronically search for these  
591 ICD-10 codes among all outpatient encounters at the MVAMC, and can limit our searches to  
592 specific dates and clinics. In our pre-trial planning, we asked a sample of patients about  
593 participation in a hypothetical study. Over 50% indicated that they would be willing to  
594 participate, in principle, and over 1/3 were reasonably certain that they would participate.  
595

596 Finally, we will ask the pharmacy service to generate a daily electronic report of  
597 prescriptions for 7-14 days of ciprofloxacin or trimethoprim/sulfamethoxazole. This list will  
598 be used as an additional method for identifying potential subjects that are not found via the  
599 ICD-10 codes or direct referral.  
600

601 Currently, recruitment at the MVAMC is at 4.6 subjects/month. Assuming a 30% higher rate  
602 at the MEDVAMC, based on 33% more male UTI episodes annually and approximately 30%  
603 larger population served, we anticipate a recruitment rate at the MEDVAMC of 6/month.  
604 With a combined rate of 10.6/month, we anticipate 16.8 months to enroll the additional 179  
605 subjects needed. With funding approved through December 2018, there is sufficient time to  
606 both enroll and follow the required number of subjects.  
607

608  
609

## **2.f. Patient contact and enrollment**

610 After being identified as a potential subject (i.e., a man presenting with urinary symptoms)  
611 patients will be contacted by the study coordinator, either by phone or a letter sent to them if  
612 unable to reach by phone, and the study will be explained to them in detail. Eligible subjects  
613 willing to participate in the study will be consented and randomized to shorter vs. longer  
614 duration therapy, presuming that their provider subsequently ordered either ciprofloxacin or  
615 TMP-SMZ for 7 to 14 days. As mentioned above, eligible subjects can enroll by returning to  
616 the Minneapolis VAMC or the MEDVAMC for a study visit, via a home visit, or by mail.  
617 Home visits and mail enrollment are being offered as preliminary enrollment has been slower  
618 than anticipated, with the single largest reason for not enrolling being time constraints of  
619 scheduling a visit at the MVAMC or difficulty arranging transportation.

620 Home visits will be conducted in the greater Minneapolis/St. Paul or Houston metropolitan  
621 area by the study coordinator after review of the medical record for any safety issues, using  
622 methods used by Home and Community Care nurses at the Minneapolis VA. Any patient  
623 with a behavioral flag, history of inappropriate behavior, or other indications of a possible  
624 safety issue will NOT be eligible for home enrollment. The study coordinator will be  
625 reimbursed for mileage driven based on the current allowable federal reimbursement rate per  
626 local facility policy.



627 Mail enrollment will be offered to eligible subjects who live outside of the greater  
628 Minneapolis/St. Paul or Houston metropolitan area, or who prefer to not have an in-person  
629 study visit. Such subjects will be identified by the study coordinator, have the study  
630 explained to them in detail via telephone, and then have an informed consent and HIPAA  
631 authorization form sent to them. Subjects that were unable to be reached by phone will have  
632 a letter sent to them explaining that they may be eligible for a study. Study staff contact  
633 information will be included in that letter so they may call staff if interested in participating.  
634 To ensure there is no unnecessary time delay, the subject will also be sent the mail  
635 enrollment forms with the letter. Study staff will attempt to reach subject via telephone after  
636 sending the letter and mail enrollment forms. After receiving the signed forms from the  
637 subject, the research pharmacist will release the study medication to the subject. All  
638 shipments will be by overnight delivery, with the study coordinator remaining in contact as  
639 needed via telephone to answer any questions and to ensure that the subject understands  
640 when to begin the study medication.

641 Subjects not seen and evaluated on the day of treatment initiation will be contacted using the  
642 contact information listed in CPRS. In order to avoid “cold-calling” patients, all men  
643 presenting to the involved outpatient clinics with urinary symptoms will be provided an  
644 informational sheet regarding the study, and informing them that they may be contacted via  
645 telephone. A number to call to opt-out of such contact will be included.

646

#### 647 **2.g. Sampling of the intestinal microbiota (currently only offered at the MVAMC)**

648 Subjects in the resistance sub-study will provide 2 samples of their intestinal microbiota, the  
649 first obtained via rectal swab performed by study staff at the time of enrollment at the  
650 MVAMC (or self-collected at home for mail enrollment), the second collected and submitted  
651 by mail 1 week after completion of study medication. Subjects enrolled via home visit can  
652 enroll in the sub-study using self-collected swabs. Although obtaining a rectal swab is mildly  
653 invasive and may cause slight discomfort, it has been performed in numerous research  
654 studies and is part of routine clinical activity in many U.S. hospitals<sup>50</sup>. We anticipated that  
655 only a minority of subjects would agree to this sampling; however, during our mock-  
656 enrollment exercise we were surprised to find that 95% of the 19 patients who agreed in  
657 principle to participate in the main trial also indicated willingness to participate in the  
658 resistance sub-study. Since it is unlikely that patients will feel confident in their ability to  
659 collect their own rectal swabs, for the second sample we will ask them to swab a stool  
660 specimen and return the swab in a provided mailer, similar to the well-established practice of  
661 screening for colon cancer using home-collected fecal occult blood cards.

662 Swabs will be delivered to and processed in the research laboratory of Dr. James Johnson,  
663 which has extensive experience in the isolation, characterization, and storage of enteric  
664 bacteria, especially *E. coli*. For this study, the required microbiological techniques are  
665 relatively straightforward, and the number of samples per week modest, such that the time  
666 and space required for this sub-study will not be onerous. Swabs will be entered into a  
667 registry as they are received, with a study number used to link clinical and laboratory  
668 information. Swabs will be plated onto plain and antimicrobial-supplemented modified  
669 Mueller-Hinton agar plates (i.e., Mueller-Hinton agar containing bile salts and neutral red), to

670 selectively recover and detect the lactose-fermentation characteristic of any Gram-negative  
671 bacilli in the specimen, both generically and specifically those resistant to the included  
672 antimicrobials (i.e., ciprofloxacin and TMP-SMZ).

673 From plates yielding growth of Gram-negative bacilli, 1 representative of up to 3 of the most-  
674 numerous colony morphologies per plate will be identified to the species level using the API-  
675 20E system (BioMerieux, Durham, NC). Susceptibility to 22 antimicrobial agents will be  
676 determined by disk diffusion, using methods, control strains, and interpretive criteria as  
677 specific by the Clinical and Laboratory Standards Institute. For each Gram-negative bacillus  
678 isolated, a semi-quantitative measure of growth will be recorded. Specimens will be scored  
679 for presence of resistant organisms using four different endpoints: (1) any detectable Gram-  
680 negative bacilli, (2) any Gram-negative bacilli resistant to ciprofloxacin (or TMP-SMZ), (3)  
681 density of ciprofloxacin (or TMP-SMZ)-resistant Gram-negative bacilli, and (4) a Gram-  
682 negative bacilli resistance score, which will be the sum of all unique resistance markers  
683 detected among the various Gram-negative bacilli isolated from the specimen.

684

685

## 686 **2.h. Subject compensation**

687 Subjects will receive \$40 at the time of enrollment in the parent trial to compensate them for  
688 their travel and time commitment, regardless of whether they choose to participate in the  
689 resistance sub-study. Subjects enrolling in the resistance sub-study will receive \$20 for the  
690 first fecal swab (obtained at the study visit/after mail enrollment), and an additional \$30 for  
691 the second fecal swab. The higher compensation for the second swab reflects the extra effort  
692 and inconvenience subjects may experience with collecting and mailing the sample. This  
693 yields a maximum possible compensation of \$90. Finally, patients who received their initial  
694 antibiotics through the VA pharmacy and were charged a co-pay will have this co-pay  
695 waived or refunded to them in accordance with VA policy.

696

## 697 **2.i. Potential complications during therapy**

698 During treatment for their UTI episode, subjects may experience a number of possible  
699 unexpected events, some of which could represent complications of the antimicrobials they  
700 are receiving. It is unknown whether treatment duration will affect the frequency or severity  
701 of any of these events. The most common adverse drug events associated with antimicrobial  
702 therapy include nausea, vomiting, diarrhea, dizziness, and headache. Less frequently  
703 encountered adverse drug events include allergic reactions (including rash, renal injury, and  
704 anaphylaxis), *C. difficile* infection, and increased or decreased effect of other medications,  
705 including warfarin. Because subjects are not being assigned to specific antimicrobials by  
706 study personnel, extensive discussion regarding the potential harms of the antimicrobial their  
707 provider prescribed is beyond the scope of the study. Instead, at the time of enrollment study  
708 personnel will briefly review potential generic harms of antimicrobials, will inform patients  
709 that treatment duration may or may not influence the probability of experiencing any harms,  
710 and will remind subjects to report any adverse events to their primary care provider or the

711 MVAMC or MEDVAMC Emergency Department. A further assessment of adverse drug  
712 events will be conducted during each study contact, with the details of any reported potential  
713 harms being recorded.

714

## 715 **2.j. Follow-up and outcome assessment**

716 Follow-up telephone contacts will occur at four time points, i.e., (i) on or about the time of  
717 medication cessation, (ii) 7 ( $\pm$  2) days after medication cessation, (iii) 14 ( $\pm$  2) days after  
718 medication cessation and (iv) 28 ( $\pm$  2) days after medication cessation.

719 (i) The first contact is primarily to assess for medication adherence and any adverse drug  
720 effects. Study personnel will inquire regarding adherence and will screen for adverse drug  
721 events, both via an open-ended question and by specifically inquiring regarding the common  
722 symptoms of nausea, vomiting, diarrhea, dizziness, headache, and drug allergy. Subjects will  
723 be encouraged to refer to their symptom diary to ensure accurate recall.

724 (ii) At the second contact (7 days after medication cessation, either 7 or 14 days after the last  
725 dose of active antimicrobial), **resolution of UTI symptoms (the primary outcome)** will be  
726 assessed. Additionally, adverse events will again be assessed, subjects will be asked whether  
727 there has been interval retreatment for UTI, and which treatment (active or placebo) they  
728 think they received. Subjects in the resistance sub-study will be reminded during this call to  
729 obtain and return a stool swab in the provided mailer.

730 (iii) At the third contact (14 days after medication cessation, either 14 or 21 days after the last  
731 dose of active antimicrobial), resolution of UTI symptoms will again be assessed, and  
732 subjects will again be asked about adverse events and interval retreatment for UTI. After  
733 unblinding, the assessment occurring 14 days after the last dose of active antimicrobial will  
734 be used for analysis.

735 (iv) The fourth contact (28 days after medication cessation) will again include an assessment  
736 of adverse drug events and an inquiry as to any retreatment for UTI. All subjects having  
737 reported initial resolution of their UTI symptoms will be assessed for the secondary outcome  
738 of recurrent UTI, defined as recurrence of UTI symptoms and receipt of antimicrobial  
739 treatment.

740 If at any time subjects report new or unresolved UTI symptoms, symptoms consistent with *C.*  
741 *difficile* infection, or any other potential complication of antimicrobial therapy, they will be  
742 directed to seek medical care from their primary provider or the MVAMC or MEDVAMC  
743 Emergency Department. Severity of reported adverse events will be assessed and recorded  
744 (see section 2.m)

745

## 746 **2.k. Safety and monitoring**

747 Subject-specific safety monitoring will be performed via symptom review during the  
748 telephone contacts. Additionally, subjects will be given contact information for the primary

749 investigator and the study coordinator, and will be encouraged to contact study personnel if  
 750 any suspected adverse events occur between scheduled study calls, in addition to contacting  
 751 their primary care provider or the MVAMC or MEDVAMC Emergency Department. Serious  
 752 adverse events will be reported by study personnel to the local Institutional Review Board  
 753 (IRB) per MVAMC and MEDVAMC policy, and each such event will be reviewed by the  
 754 IRB to determine whether it was potentially study-related. Monitoring to detect an excess of  
 755 clinical outcomes or adverse events in either arm (including treatment failure for the initial  
 756 UTI, recurrence of UTI, and adverse drug events, including *C. difficile* infection) will be  
 757 performed by an independent DSMB that will include at least one biostatistician with clinical  
 758 trial experience.

759 Study records will be maintained within the MVAMC and MEDVAMC on secure research  
 760 drives, accessible only to the research team. Any paper records will be stored in a locked file  
 761 cabinet in the principal investigator’s locked office (3B-126) at the MVAMC, and in the  
 762 office of the co-investigator at the MEDVAMC.

763 **2.1. Definitions for safety and monitoring.**

764 *Adverse event: an adverse event (AE)* is any untoward medical occurrence associated with  
 765 the antimicrobial treatment, whether or not the event is considered related to the  
 766 antimicrobial.

767 *Adverse reaction:* any adverse event caused by antimicrobial treatment.

768 *Suspected adverse reaction (SAR):* any adverse event for which there is a reasonable  
 769 possibility that the antimicrobial treatment caused the adverse event. “Reasonable  
 770 possibility” means there is evidence to suggest a causal relationship between the  
 771 antimicrobial treatment and the adverse event. Suspected adverse reaction implies a lesser  
 772 degree of certainty about causality than “adverse reaction,” which means any adverse event  
 773 caused by the antimicrobial treatment.

774 *Serious adverse event (SAE) or serious suspected adverse reaction:* An adverse event or  
 775 suspected adverse reaction is considered “serious” if, in the view of either the investigator, or  
 776 the IRB, it results in any of the following outcomes:

- 777 -Death
- 778 -Life-threatening adverse event
- 779 -Inpatient hospitalization for  $\geq 24$  hours or prolongation of an existing hospitalization
- 780 -Persistent or significant incapacity or substantial disruption of the ability to conduct
- 781 normal life functions

782  
 783 Important medical events that may not result in death, be life-threatening, or require  
 784 hospitalization may be considered serious when, based upon appropriate medical judgment,  
 785 they may jeopardize the subject and may require medical or surgical intervention to prevent  
 786 one of the outcomes listed in this definition.

787

788 *Unexpected adverse event* or *unexpected suspected adverse reaction*: an adverse event or  
 789 suspected adverse reaction is considered unexpected or unanticipated if it is not listed in the  
 790 protocol.

791 *Life-threatening*: An adverse event or suspected adverse reaction that places the subject at  
 792 immediate risk of death. It does not include an AE or SAR that, had it occurred in a more  
 793 severe form, might have caused death.

794 **2.m. Anticipated adverse events**

795 The following lists anticipated adverse events, including some that are rare but serious:

- 796 -Diarrhea
- 797 -Nausea
- 798 -Vomiting
- 799 -Headache
- 800 -Drug allergy
- 801 -Pain at tendon insertions
- 802 -Blood sugar fluctuations among diabetic patients, including severe decreases leading to  
 803 coma
- 804 -Psychiatric side effects such as disturbance in attention, memory impairment, and delirium
- 805 -Abdominal aortic aneurysm rupture

806  
 807 Note that failure to resolve UTI symptoms (i.e., not meeting the primary outcome), is not  
 808 considered an adverse event, but rather will be recorded in the assessment of the primary  
 809 outcome. Severity of adverse events will be determined using a severity scale (grade 0-5)  
 810 adapted from the Common Terminology Criteria for Adverse Events, version 4.0, as listed  
 811 below.  
 812

| Adverse event                            | Grade                                                                                            |                                                                                                         |                                                                                                                                                                      |                                                                                               |       |
|------------------------------------------|--------------------------------------------------------------------------------------------------|---------------------------------------------------------------------------------------------------------|----------------------------------------------------------------------------------------------------------------------------------------------------------------------|-----------------------------------------------------------------------------------------------|-------|
|                                          | 1                                                                                                | 2                                                                                                       | 3                                                                                                                                                                    | 4                                                                                             | 5     |
| Diarrhea                                 | Increase of <4 stools per day over baseline; mild increase in ostomy output compared to baseline | Increase of 4 - 6 stools per day over baseline; moderate increase in ostomy output compared to baseline | Increase of >=7 stools per day over baseline; incontinence; hospitalization indicated; severe increase in ostomy output compared to baseline; limiting self care ADL | Life-threatening consequences; urgent intervention indicated, intensive care unit utilization | Death |
| <i>C. difficile</i> infection (diarrhea) | Increase of <4 stools per day over baseline;                                                     | Increase of 4 - 6 stools per day over                                                                   | Increase of >=7 stools per day over baseline;                                                                                                                        | Life-threatening consequences;                                                                | Death |

|                                                 |                                                      |                                                                                    |                                                                                                                                       |                                                                           |       |
|-------------------------------------------------|------------------------------------------------------|------------------------------------------------------------------------------------|---------------------------------------------------------------------------------------------------------------------------------------|---------------------------------------------------------------------------|-------|
| with a positive assay for <i>C. difficile</i> ) | mild increase in ostomy output compared to baseline  | baseline; moderate increase in ostomy output compared to baseline                  | incontinence; hospitalization indicated; severe increase in ostomy output compared to baseline; limiting self care ADL                | urgent intervention indicated, intensive care unit utilization, colectomy |       |
| Nausea                                          | Loss of appetite without alteration in eating habits | Oral intake decreased without significant weight loss, dehydration or malnutrition | Inadequate oral caloric or fluid intake; tube feeding, TPN, or hospitalization indicated                                              | NA                                                                        | NA    |
| Vomiting                                        | 1 - 2 episodes (separated by 5 minutes) in 24 hrs    | 3 - 5 episodes (separated by 5 minutes) in 24 hrs                                  | >=6 episodes (separated by 5 minutes) in 24 hrs; tube feeding, TPN or hospitalization indicated                                       | Life-threatening consequences; urgent intervention indicated              | Death |
| Headache                                        | Mild pain                                            | Moderate pain; limiting instrumental ADL                                           | Severe pain; limiting self care ADL                                                                                                   | NA                                                                        | NA    |
| Drug allergy                                    | Mild rash, no alteration of daily activities         | Moderate rash, treated with topical or oral medications                            | Symptomatic bronchospasm, with or without urticaria; parenteral intervention indicated; allergy-related edema/angioedema; hypotension | Life-threatening consequences; urgent intervention indicated              | Death |

|                                         |                                    |                                          |                                     |                                                          |       |
|-----------------------------------------|------------------------------------|------------------------------------------|-------------------------------------|----------------------------------------------------------|-------|
| Hypoglycemia (among diabetic patients)  | < lower limit of normal – 55 mg/dL | <55 – 40 mg/dL                           | <40 – 30 mg/dL                      | <30 mg/dL; life-threatening consequences, seizures, coma | Death |
| Hyperglycemia (among diabetic patients) | >ULN - 160 mg/dL                   | >160 - 250 mg/dL                         | >250 - 500 mg/dL                    | >500 mg/dL, life-threatening consequences                | Death |
| Pain at tendon insertion                | Mild pain                          | Moderate pain, limiting Instrumental ADL | Severe pain, limiting self care ADL | Complete tendon rupture, need for surgery                | NA    |
| Abdominal aortic aneurysm rupture       | NA                                 | NA                                       | NA                                  | Eminent or emergent rupture necessitating surgery        | Death |

813  
814  
815  
816  
817  
818  
819  
820  
821  
822  
823  
824  
825  
826  
827  
828  
829  
830  
831  
832  
833  
834  
835  
836  
837  
838

## 2.n. Statistical methods

**Primary outcome: resolution of UTI symptoms 14 days after completing active antimicrobial therapy.** This outcome will be assessed in a binary manner. **Subjects with persistent UTI symptoms or having received further antimicrobials because of UTI symptoms will be considered to have not met the primary outcome, whereas those without persistent UTI symptoms and not having received further antimicrobials will be considered to have met the primary outcome.** The proportion of subjects meeting the primary outcome will be compared between the 2 treatment groups using a per-protocol analysis, with subjects analyzed according to which treatment they received. An intention-to-treat analysis will be performed as a secondary analysis. Subjects reporting taking 7 or fewer days of study medication will be analyzed as having received shorter-duration therapy, whereas subjects reporting taking 8 or more days of study medication will be analyzed as having received longer-duration therapy. Non-inferiority testing of the differences in the group proportions of symptom resolution will be done using a z-statistic derived by the adaptive percentage non-inferiority margin approach described by Laster and Johnson<sup>51, 52</sup>. Exploratory sub-group analysis using multiple logistic regression will be performed to assess outcomes stratified by the following putatively clinically relevant characteristics: catheter-associated UTI, functional or mechanical urinary tract obstruction, and diabetes. We anticipate that the proposed study will be under-powered for these analyses, and thus they will primarily be used as pilot data to identify potential specialized populations for future study.

839 **Secondary outcome (1): recurrence rates at 28 days after completing study medication.**  
 840 The proportion of subjects reporting recurrence of symptomatic UTI (defined as for the study  
 841 entry criteria, but occurring after the primary outcome assessment) in each group will be  
 842 calculated, along with corresponding 95% confidence intervals. Between-group comparisons  
 843 will be made using the Chi-square test.  
 844

845 **Secondary outcome (2): incidence of any adverse drug events in the 28 days after**  
 846 **completing study medication.**

847 The incidence of adverse drug events, including nausea, vomiting, diarrhea, dizziness,  
 848 headache, drug allergy, and *C. difficile* infection, both individually and in aggregate, will be  
 849 compared between treatment groups. For subjective symptoms, subjects will be asked to use  
 850 their symptom diary to quantify the number of days they experienced each adverse event.  
 851 Severity will be determined using a severity scale (grade 0-5) adapted from the Common  
 852 Terminology Criteria for Adverse Events, version 4.0. Adverse events will be analyzed first  
 853 as whether a subject experienced any adverse drug event vs. none (Chi-square test), and then  
 854 by comparing the number of days on which each subjective event was experienced (Mann-  
 855 Whitney U-test). Cases of suspected drug allergy will be reviewed by 2 Infectious Disease  
 856 staff physicians (who are blinded to study group assignment) to assess: certainty of allergy  
 857 diagnosis, relatedness to the prescribed antimicrobial, and clinical severity, based on  
 858 information collected by study personnel and contained in the medical record. Subjects  
 859 having a history of prior *C. difficile* infection will be recorded, but will not be excluded from  
 860 analysis since these patients are a small but important subgroup, for which guidance  
 861 regarding therapy duration is of particular interest. The randomization process should help  
 862 ensure that there is no imbalance in such patients between treatment groups.  
 863

864 **Secondary outcome (3): intestinal carriage of antimicrobial-resistant Gram-negative**  
 865 **bacilli after completing study medication, as compared to a baseline sample taken early**  
 866 **in treatment.**

867 For the resistance sub-study, the outcomes of interest are (i) the proportion of subjects who  
 868 develop newly detected intestinal carriage of antimicrobial-resistant Gram-negative bacilli  
 869 between the baseline sample during treatment and the sample obtained 7 days after  
 870 completing study medication (Chi-square test), (ii) the density of antimicrobial-resistant  
 871 Gram-negative bacilli among samples with any growth (t-test or Mann-Whitney U-test,  
 872 depending on the frequency distributions), and (iii) the overall resistance score, defined as  
 873 the total number of antimicrobials which at least one of the isolated Gram-negative bacilli is  
 874 resistant to (t-test or Mann-Whitney U-test).  
 875

876 2.o. Proposed timetable

| Pre-study                       | Year 1            | Year 2               | Year 3               | Year 4               | Year 5                         |
|---------------------------------|-------------------|----------------------|----------------------|----------------------|--------------------------------|
| IRB approval                    | Purchase supplies | Patient enrollment   | Patient enrollment   | Patient enrollment   | Complete enrollment            |
| Create database and case-report | Hire personnel    | Process rectal/stool | Process rectal/stool | Process rectal/stool | Data analysis<br>Presentation/ |



|                                                                     |                                                                                            |       |       |       |                        |
|---------------------------------------------------------------------|--------------------------------------------------------------------------------------------|-------|-------|-------|------------------------|
| forms<br><br>Educate and coordinate with clinic staff and providers | Patient enrollment<br><br>Process rectal/stool swabs<br><br>Assess rate of subject accrual | swabs | swabs | swabs | publication of results |
|---------------------------------------------------------------------|--------------------------------------------------------------------------------------------|-------|-------|-------|------------------------|

877

878

879

880 **3. Summary**

881 We propose a single-center, randomized, double-blind, placebo-controlled trial of treatment  
 882 duration for male UTI, which is a common but relatively understudied infectious disease in the  
 883 VA population. The results of this study will allow clinicians to make an evidence-based  
 884 treatment decision regarding an extremely common clinical condition among male veterans  
 885 and non-veterans. This could help preserve the efficacy of valuable antimicrobials during a  
 886 time of steadily increasing antimicrobial resistance and protect future male patients from  
 887 insufficient or excessive antimicrobial therapy for their UTI.

888

889 **4. References**

- 890 **1.** Griebing TL. Urinary Tract Infection in Men. In: Litwin MS, Saigal CS, eds. *Urologic*  
891 *Diseases in America*. Washington, DC: US Government Printing Office; 2007:623- 645.
- 892 **2.** Griebing TL. Urologic diseases in america project: trends in resource use for urinary  
893 tract infections in men. *J Urol*.2005;173(4):1288-1294.
- 894 **3.** Drekonja DM, Rector TS, Cutting A, Johnson JR. Urinary Tract Infection in Male  
895 Veterans: Treatment Patterns and Outcomes. *Arch Intern Med*.2012;1-7.
- 896 **4.** Ulleryd P, Sandberg T. Ciprofloxacin for 2 or 4 weeks in the treatment of febrile urinary  
897 tract infection in men: a randomized trial with a 1 year follow-up. *Scand J Infect*  
898 *Dis*.2003;35(1):34-39.
- 899 **5.** Dow G, Rao P, Harding G, et al. A prospective, randomized trial of 3 or 14 days of  
900 ciprofloxacin treatment for acute urinary tract infection in patients with spinal cord  
901 injury. *Clin Infect Dis*.2004;39(5):658-664.
- 902 **6.** Lipsky BA. Prostatitis and urinary tract infection in men: what's new; what's true? *Am J*  
903 *Med*.1999;106(3):327-334.
- 904 **7.** Nicolle LE. A practical guide to antimicrobial management of complicated urinary tract  
905 infection. *Drugs Aging*.2001;18(4):243-254.
- 906 **8.** Drekonja DM, Johnson JR. Urinary tract infections. *Prim Care*.2008;35(2):345-367, vii.
- 907 **9.** Loo VG, Poirier L, Miller MA, et al. A predominantly clonal multi-institutional outbreak  
908 of *Clostridium difficile*-associated diarrhea with high morbidity and mortality. *N Engl J*  
909 *Med*.2005;353(23):2442-2449.
- 910 **10.** Kelly CP, Pothoulakis C, LaMont JT. *Clostridium difficile* colitis. *N Engl J*  
911 *Med*.1994;330(4):257-262.
- 912 **11.** Boucher HW, Talbot GH, Bradley JS, et al. Bad bugs, no drugs: no ESKAPE! An update  
913 from the Infectious Diseases Society of America. *Clin Infect Dis*.2009;48(1):1-12.
- 914 **12.** Gupta K, Hooton TM, Roberts PL, Stamm WE. Short-course nitrofurantoin for the  
915 treatment of acute uncomplicated cystitis in women. *Arch Intern*  
916 *Med*.2007;167(20):2207-2212.
- 917 **13.** Gupta K, Hooton TM, Naber KG, et al. International clinical practice guidelines for the  
918 treatment of acute uncomplicated cystitis and pyelonephritis in women: A 2010 update by  
919 the Infectious Diseases Society of America and the European Society for Microbiology  
920 and Infectious Diseases. *Clin Infect Dis*.2011;52(5):e103-120.
- 921 **14.** Raz R, Chazan B, Kennes Y, et al. Empiric use of trimethoprim-sulfamethoxazole (TMP-  
922 SMX) in the treatment of women with uncomplicated urinary tract infections, in a  
923 geographical area with a high prevalence of TMP-SMX-resistant uropathogens. *Clin*  
924 *Infect Dis*.2002;34(9):1165-1169.
- 925 **15.** Talan DA, Stamm WE, Hooton TM, et al. Comparison of ciprofloxacin (7 days) and  
926 trimethoprim-sulfamethoxazole (14 days) for acute uncomplicated pyelonephritis  
927 pyelonephritis in women: a randomized trial. *JAMA*.2000;283(12):1583-1590.
- 928 **16.** Peterson J, Kaul S, Khashab M, Fisher AC, Kahn JB. A double-blind, randomized  
929 comparison of levofloxacin 750 mg once-daily for five days with ciprofloxacin 400/500  
930 mg twice-daily for 10 days for the treatment of complicated urinary tract infections and  
931 acute pyelonephritis. *Urology*.2008;71(1):17-22.
- 932 **17.** Hooton TM, Roberts PL, Stapleton AE. Cefpodoxime vs ciprofloxacin for short-course  
933 treatment of acute uncomplicated cystitis: a randomized trial. *JAMA*.2012;307(6):583-  
934 589.

- 935 **18.** Fosfomycin for urinary tract infections. *Med Lett Drugs Ther.* 1997;39(1005):66-68.
- 936 **19.** Redelings MD, Sorvillo F, Mascola L. Increase in *Clostridium difficile*-related mortality  
937 rates, United States, 1999-2004. *Emerg Infect Dis.* 2007;13(9):1417-1419.
- 938 **20.** McFarland LV. Update on the changing epidemiology of *Clostridium difficile*-associated  
939 disease. *Nat Clin Pract Gastroenterol Hepatol.* 2008;5(1):40-48.
- 940 **21.** McDonald LC, Owings M, Jernigan DB. *Clostridium difficile* infection in patients  
941 discharged from US short-stay hospitals, 1996-2003. *Emerg Infect Dis.* 2006;12(3):409-  
942 415.
- 943 **22.** Severe *Clostridium difficile*-associated disease in populations previously at low risk--four  
944 states, 2005. *MMWR Morb Mortal Wkly Rep.* 2005;54(47):1201-1205.
- 945 **23.** Tamma PD, Turnbull AE, Milstone AM, Lehmann CU, Sydnor ER, Cosgrove SE.  
946 Ventilator-associated tracheitis in children: does antibiotic duration matter? *Clin Infect*  
947 *Dis.* 2011;52(11):1324-1331.
- 948 **24.** Chastre J, Wolff M, Fagon JY, et al. Comparison of 8 vs 15 days of antibiotic therapy for  
949 ventilator-associated pneumonia in adults: a randomized trial. *JAMA.* 2003;290(19):2588-  
950 2598.
- 951 **25.** Nordenstam GR, Brandberg CA, Oden AS, Svanborg Eden CM, Svanborg A. Bacteriuria  
952 and mortality in an elderly population. *N Engl J Med.* 1986;314(18):1152-1156.
- 953 **26.** Johnson JR, Clabots C, Kuskowski MA. Multiple-host sharing, long-term persistence,  
954 and virulence of *Escherichia coli* clones from human and animal household members. *J*  
955 *Clin Microbiol.* 2008;46(12):4078-4082.
- 956 **27.** Johnson JR, Owens K, Gajewski A, Clabots C. *Escherichia coli* colonization patterns  
957 among human household members and pets, with attention to acute urinary tract  
958 infection. *J Infect Dis.* 2008;197(2):218-224.
- 959 **28.** van de Sande-Bruinsma N, Grundmann H, Verloo D, et al. Antimicrobial drug use and  
960 resistance in Europe. *Emerg Infect Dis.* 2008;14(11):1722-1730.
- 961 **29.** Barbosa TM, Levy SB. The impact of antibiotic use on resistance development and  
962 persistence. *Drug Resist Updat.* 2000;3(5):303-311.
- 963 **30.** Johnson L, Sabel A, Burman WJ, et al. Emergence of fluoroquinolone resistance in  
964 outpatient urinary *Escherichia coli* isolates. *Am J Med.* 2008;121(10):876-884.
- 965 **31.** Gerding DN, Johnson S, Peterson LR, Mulligan ME, Silva J, Jr. *Clostridium difficile*-  
966 associated diarrhea and colitis. *Infect Control Hosp Epidemiol.* 1995;16(8):459-477.
- 967 **32.** Drekonja DM, Amundson WH, Decarolis DD, Kuskowski MA, Lederle FA, Johnson JR.  
968 Antimicrobial use and risk for recurrent *Clostridium difficile* infection. *Am J*  
969 *Med.* 2011;124(11):1081 e1081-1087.
- 970 **33.** Fowler S, Webber A, Cooper BS, et al. Successful use of feedback to improve antibiotic  
971 prescribing and reduce *Clostridium difficile* infection: a controlled interrupted time series.  
972 *J Antimicrob Chemother.* 2007;59(5):990-995.
- 973 **34.** O'Connor KA, Kingston M, O'Donovan M, Cryan B, Twomey C, O'Mahony D.  
974 Antibiotic prescribing policy and *Clostridium difficile* diarrhoea. *QJM.* 2004;97(7):423-  
975 429.
- 976 **35.** Ludlam H, Brown N, Sule O, Redpath C, Coni N, Owen G. An antibiotic policy  
977 associated with reduced risk of *Clostridium difficile*-associated diarrhoea. *Age*  
978 *Ageing.* 1999;28(6):578-580.
- 979 **36.** Cohen SH, Gerding DN, Johnson S, et al. Clinical practice guidelines for *Clostridium*  
980 *difficile* infection in adults: 2010 update by the society for healthcare epidemiology of

- 981 America (SHEA) and the infectious diseases society of America (IDSA). *Infect Control*  
 982 *Hosp Epidemiol.*2010;31(5):431-455.
- 983 **37.** Hepburn MJ, Dooley DP, Skidmore PJ, Ellis MW, Starnes WF, Hasewinkle WC.  
 984 Comparison of short-course (5 days) and standard (10 days) treatment for uncomplicated  
 985 cellulitis. *Arch Intern Med.*2004;164(15):1669-1674.
- 986 **38.** Stamm WE, McKeivitt M, Counts GW. Acute renal infection in women: treatment with  
 987 trimethoprim-sulfamethoxazole or ampicillin for two or six weeks. A randomized trial.  
 988 *Ann Intern Med.*1987;106(3):341-345.
- 989 **39.** Sandberg T, Skoog G, Hermansson AB, et al. Ciprofloxacin for 7 days versus 14 days in  
 990 women with acute pyelonephritis: a randomised, open-label and double-blind, placebo-  
 991 controlled, non-inferiority trial. *Lancet.*2012;380(9840):484-490.
- 992 **40.** Hooton TM. The current management strategies for community-acquired urinary tract  
 993 infection. *Infect Dis Clin North Am.*2003;17(2):303-332.
- 994 **41.** Hooton TM, Stamm WE. Diagnosis and treatment of uncomplicated urinary tract  
 995 infection. *Infect Dis Clin North Am.*1997;11(3):551-581.
- 996 **42.** Drekonja DM, Okoye NC, Kuskowski MA, Johnson JR. Appropriateness of urinary tract  
 997 infection diagnosis and treatment duration. *Arch Intern Med.*2010;170(5):489-490.
- 998 **43.** Shehab N, Patel PR, Srinivasan A, Budnitz DS. Emergency department visits for  
 999 antibiotic-associated adverse events. *Clin Infect Dis.*2008;47(6):735-743.
- 1000 **44.** DeMets DL, Lan KK. Interim analysis: the alpha spending function approach. *Stat*  
 1001 *Med.*1994;13(13-14):1341-1352; discussion 1353-1346.
- 1002 **45.** Arav-Boger R, Leibovici L, Danon YL. Urinary tract infections with low and high colony  
 1003 counts in young women. Spontaneous remission and single-dose vs multiple-day  
 1004 treatment. *Arch Intern Med.*1994;154(3):300-304.
- 1005 **46.** Ferry SA, Holm SE, Stenlund H, Lundholm R, Monsen TJ. The natural course of  
 1006 uncomplicated lower urinary tract infection in women illustrated by a randomized  
 1007 placebo controlled study. *Scand J Infect Dis.*2004;36(4):296-301.
- 1008 **47.** Ronald AR, Harding GK. Complicated urinary tract infections. *Infect Dis Clin North*  
 1009 *Am.*1997;11(3):583-592.
- 1010 **48.** Ulleryd P. Febrile urinary tract infection in men. *Int J Antimicrob Agents.*2003;22 Suppl  
 1011 2:89-93.
- 1012 **49.** van Nieuwkoop C, van't Wout JW, Assendelft WJ, et al. Treatment duration of febrile  
 1013 urinary tract infection (FUTIRST trial): a randomized placebo-controlled multicenter trial  
 1014 comparing short (7 days) antibiotic treatment with conventional treatment (14 days).  
 1015 *BMC Infect Dis.*2009;9:131.
- 1016 **50.** Johnson JR, Delavari P. Concurrent fecal colonization with extraintestinal pathogenic  
 1017 *Escherichia coli* in a homosexual man with recurrent urinary tract infection and in his  
 1018 male sex partner. *Clin Infect Dis.*2002;35(6):E65-68.
- 1019 **51.** Laster LL, Johnson MF, Kotler ML. Non-inferiority trials: the 'at least as good as'  
 1020 criterion with dichotomous data. *Stat Med.*2006;25(7):1115-1130.
- 1021 **52.** Laster LL, Johnson MF. Non-inferiority trials: the 'at least as good as' criterion. *Stat*  
 1022 *Med.*2003;22(2):187-200.

1023  
 1024
