# Supplementary material
Source: PubMed Central journal article supplement (PMC8317010)
Supplement: jama-e219899-s003.pdf [file jama-e219899-s003.pdf]

## Data Sharing Statement

### Data

**Data available:** Yes

**Data types:** Other (please specify)

**Additional Information:** No formal plan submitted at time of grant. Will handle such requests on a case-by-case basis with input from local privacy officer and institutional review board.

**How to access data:** Requests for access to data should be made to [drek0002@umn.edu](mailto:drek0002@umn.edu). Requests will be reviewed by the institutional review board and the local privacy officer

**When available:** With publication

### Supporting Documents

**Document types:** None

### Additional Information

**Who can access the data:** Researchers whose proposed use of the data has been approved

**Types of analyses:** Any purpose

**Mechanisms of data availability:** With investigator support

**Any additional restrictions:** Local IRB approval will be required
